# Supplementary material
Source: ML conference proceedings conference paper supplement (https://openreview.net/forum?id=EriR6Ec69a)
Supplement: supplementary_material [file attachment]

## A APPENDIX

### A.1 DIMENSIONALITY ANALYSIS UNDER DISTRIBUTION SHIFT

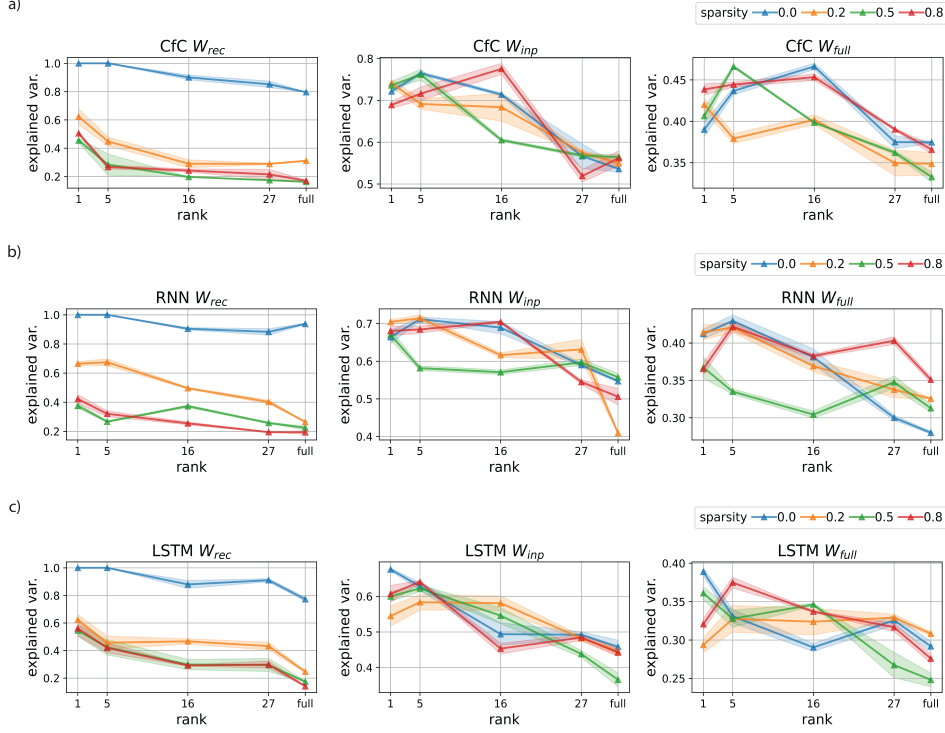

Figure 8: Effective dimensionalities of the recurrent, input and full state-space trajectories collected during online testing, under the noise distribution shift (for details, refer to A.11), as measured by the explained variance of the top 5 principal components. a) CfC state-space dynamics ( $\pm 1$  SE). b) RNN state-space dynamics ( $\pm 1$  SE). c) LSTM state-space dynamics ( $\pm 1$  SE).

Recall in Figure 6, we computed the effective dimensionalities of the recurrent, input and full state-space trajectories across models, ranks and sparsities collected during an online, closed-loop simulations of the agents in an in-distribution setting. In doing so, we found that the input and full state space dimensionalities were not particularly affected by changes in the recurrent rank or sparsity. Here, we will show that the same does not hold under distribution shift and understand why this is a desirable property of the parameterization of recurrent connectivity.

In Figure 8, we find that in CfCs, RNNs and LSTMs, the effective dimensionalities of the input and full state spaces increases with the rank of the recurrent weights. This is interesting as it demonstrates the ability of the parameterization to modulate state-space dynamics outside of the recurrently-driven subspace of activity. But it also begs the question as to why we do not observe this effect in the in-distribution setting.

The primary distinction is that under distribution shift, we can imagine that adding noise to the inputs causes the input state-space trajectory to evolve in random directions, raising its dimensionality. Having a robust recurrent state presumably allows for the filtration of some of this noise, which reduces the effect it has on future model inputs. Furthermore, since we examine these trajectories in the context of a closed loop system, the input is itself a function of the previous hidden state. By making this function more robust via our low-rank prior, this in turn reduces the dimensionality of the input state-space trajectory (and by proxy the full state-space trajectory as well).

One final note is that while we observe this trend as a function of rank, we do not observe it as a function of sparsity. In particular, modulations in the dimensionality of the recurrent state-space via changes in the sparsity of the recurrent weights do not appear to impact the dimensionality of

input or full state-spaces (Figure 8). While this certainly requires further exploration, one possible hypothesis is that this is caused by the counteracting effects of sparsity on robustness. Namely, recall that sparsity both reduces the spectral radius which shortens the temporal attention span of the network, making the model more robust across time. However, it also reduces the decay rate of the singular value spectrum, making it less robust at any given point in time. These two effects potentially offset one another and prevent the sparsity in the recurrent weights from modulating the dimensionality of the input trajectory.

## A.2 TIME CONSTANT ANALYSIS

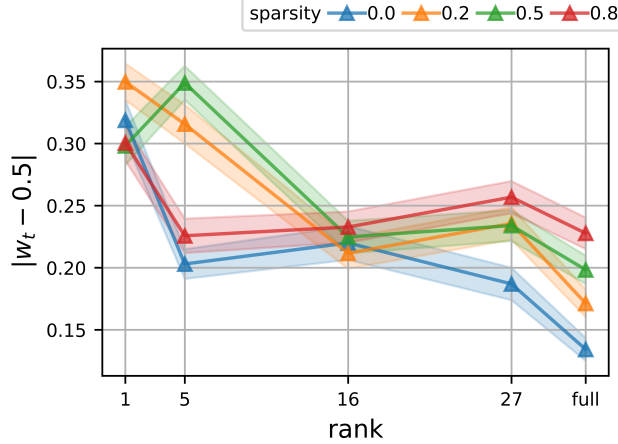

Figure 9: Average absolute deviation from 0.5 of time constant vectors in trained CfC models.

In Section 4.3, we demonstrated that on average, CfCs both learn lower spectral norms in their recurrent weights and express lower dimensional state-space trajectories than RNNs. Recall, the functional form of a CfC differs from an RNN via the time constant network  $F(\mathbf{h}_{t-1}, \mathbf{x}_t)$  which learns a vector of weights used to interpolate between  $G$  and  $H$ . Note that if  $F(\mathbf{h}_{t-1}, \mathbf{x}_t) = [1, 1, \dots, 1]$ , the network reduces to that of an RNN by placing all of its weight on a single trajectory. Because the time-constant learned by  $F$  is a function of the input, the network can dynamically adapt its interpolation weights under distribution shift by changing how much it weighs the trajectory induced by  $G$  versus the trajectory induced by  $H$ . While rationale beyond the effects of the time-constant module on the overall network dynamics warrants further exploration, the notion of gating mechanisms improving performance in neural networks is not a new one; recent work done in convolutional language models shows similar findings (Poli et al., 2023).

In any case, to better understand the time constant network, here we provide an analysis on what role modulating recurrent sparsity and rank has on the learned interpolation weights. In particular, let  $\mathbf{w}_t$  denote the interpolation weights that are the output of  $F$  at time  $t$ . We compute

$$|\mathbf{w}_t - 0.5| = \frac{\sum_{t=1}^T \sum_{i=1}^h |w_{ti} - 0.5|}{hT}$$

which measures the average deviation of the weights from 0.5. We consider this metric as a means of understanding how much the interpolation between  $G$  and  $H$  tends to rely upon only one of the trajectories (as we observe in the case of an RNN) versus evenly combining them (as would be the case if  $F$  learns to output  $[\frac{1}{2}, \frac{1}{2}, \dots, \frac{1}{2}]$ ). We find that as a function of increasing rank, the deviation of the time constant from 0.5 decreases (Figure 9). This means that low-rank CfCs tend to place more of their weight on one trajectory than the other which demonstrates the ability of the time constant network to align with the simpler recurrent dynamics promoted in the low-rank setting.

## A.3 TASK DIMENSION CONTINUED

Here, we provide some additional commentary on our discussion of the task dimension gap in Section 4.4.



At a high level, the notion of a task dimension gap which characterizes the disconnect between agents learning passively in the offline setting and learning actively in the online setting warrants further exploration and formalization. Furthermore, we note that, the notion of task dimension put forth by [Schuessler et al. \(2020\)](#) itself is more aptly decomposed into recurrent task dimension and input task dimension. In particular, as we have shown, changes in recurrent connectivity are not necessarily synonymous with changes in input connectivity (Figure 6). A given task may necessitate learning connectivities of different ranks along the input axis and recurrent axis: disentangling the two is a necessity in understanding the dynamics of recurrent neural networks. Another point to note is that recurrent task dimension is distinct from attention span along the recurrent axis, which can also be considered a function of the task. We showed that while rank and sparsity both reduce temporal attention span, they have opposing effects on the dimensionality of recurrently-driven activity. Noting this distinction is pivotal in properly characterizing recurrent dynamics.

#### A.4 DERIVING RECURRENT GRADIENTS

In this section, we provide details on the derivation for  $\mathbf{J}_t = \frac{\partial \mathbf{h}_t}{\partial \mathbf{h}_{t-1}}$  in RNNs, LSTMs and CfCs.  $\mathbf{J}_t$  is the Jacobian of the hidden-state dynamics which captures information about the rate at which the gradient is propagated across time. We motivate this further when we discuss the relationship between  $\mathbf{J}_t$  and the memory-horizon of a recurrent network in Section A.5.

##### A.4.1 RNN

Recall that the functional form of an RNN is given by

$$\mathbf{h}_t = \tanh(\mathbf{W}_h \mathbf{h}_{t-1} + \mathbf{W}_i \mathbf{x}_t + \mathbf{b})$$

where  $\mathbf{W}_h$  denotes the recurrent weights,  $\mathbf{W}_i$  denotes the input weights and  $\mathbf{b}$  denotes the bias. Then, if we let  $\odot$  denote row-wise multiplication in the case of a vector and matrix, then we have that

$$\frac{\partial \mathbf{h}_t}{\partial \mathbf{h}_{t-1}} = (1 - \tanh^2(\mathbf{h}_{t-1})) \odot \mathbf{W}_h$$

##### A.4.2 LSTM

The functional form of an LSTM is given by

$$\begin{aligned} \mathbf{i}_t &= \sigma(\mathbf{W}_{ii} \mathbf{x}_t + \mathbf{W}_{hi} \mathbf{h}_{t-1} + \mathbf{b}_i) \\ \mathbf{f}_t &= \sigma(\mathbf{W}_{if} \mathbf{x}_t + \mathbf{W}_{hf} \mathbf{h}_{t-1} + \mathbf{b}_f) \\ \mathbf{o}_t &= \sigma(\mathbf{W}_{io} \mathbf{x}_t + \mathbf{W}_{ho} \mathbf{h}_{t-1} + \mathbf{b}_o) \\ \mathbf{g}_t &= \tanh(\mathbf{W}_{ic} \mathbf{x}_t + \mathbf{W}_{hc} \mathbf{h}_{t-1} + \mathbf{b}_c) \\ \mathbf{c}_t &= \mathbf{f}_t \odot \mathbf{c}_{t-1} + \mathbf{i}_t \odot \mathbf{g}_t \\ \mathbf{h}_t &= \mathbf{o}_t \odot \tanh(\mathbf{c}_t) \end{aligned}$$

Following the notation from [Vogt et al. \(2020\)](#), if we let

$$\mathbf{y}_* = \mathbf{W}_{i*} \mathbf{x}_t + \mathbf{W}_{h*} \mathbf{h}_{t-1} + \mathbf{b}_*$$

where  $*$  is determined by the gate and  $\odot$  denotes elementwise multiplication in the case of two vectors and row-wise multiplication in the case of a vector and matrix, then we have that

$$\begin{aligned}
\frac{\partial \mathbf{f}_t}{\partial \mathbf{h}_{t-1}} &= [\sigma(\mathbf{y}_f) \odot (1 - \sigma(\mathbf{y}_f))]^T \odot \mathbf{W}_{hf} \\
\frac{\partial \mathbf{i}_t}{\partial \mathbf{h}_{t-1}} &= [\sigma(\mathbf{y}_i) \odot (1 - \sigma(\mathbf{y}_i))]^T \odot \mathbf{W}_{hi} \\
\frac{\partial \mathbf{o}_t}{\partial \mathbf{h}_{t-1}} &= [\sigma(\mathbf{y}_o) \odot (1 - \sigma(\mathbf{y}_o))]^T \odot \mathbf{W}_{ho} \\
\frac{\partial \mathbf{g}_t}{\partial \mathbf{h}_{t-1}} &= [(1 - \tanh^2(\mathbf{y}_c))]^T \odot \mathbf{W}_{hc} \\
\frac{\partial \mathbf{c}_t}{\partial \mathbf{h}_{t-1}} &= \frac{\partial \mathbf{f}_t}{\partial \mathbf{h}_{t-1}} \odot \mathbf{c}_{t-1} + \frac{\partial \mathbf{i}_t}{\partial \mathbf{h}_{t-1}} \odot \tanh(\mathbf{y}_c) + \mathbf{i}_t \odot (1 - \tanh^2(\mathbf{y}_c)) \odot \mathbf{W}_{hc} + \mathbf{f}_t \\
\frac{\partial \mathbf{h}_t}{\partial \mathbf{h}_{t-1}} &= \frac{\partial \mathbf{o}_t}{\partial \mathbf{h}_{t-1}} \odot \tanh(\mathbf{c}_t) + \mathbf{o}_t \odot (1 - \tanh^2(\mathbf{c}_t)) \odot \frac{\partial \mathbf{c}_t}{\partial \mathbf{h}_{t-1}}
\end{aligned}$$

#### A.4.3 CFC

The functional form of a CfC is given by

$$\mathbf{h}(t) = \sigma(F(\mathbf{h}_{t-1}, \mathbf{x}_t, \theta_F)) \odot G(\mathbf{h}_{t-1}, \mathbf{x}_t, \theta_G) + [1 - \sigma(F(\mathbf{h}_{t-1}, \mathbf{x}_t, \theta_F))] \odot H(\mathbf{h}_{t-1}, \mathbf{x}_t, \theta_H)$$

where  $\theta_F, \theta_G, \theta_H$  refer to the parameters in each module as given by the following equations:

$$\begin{aligned}
F(\mathbf{h}_{t-1}, \mathbf{x}_t, \theta_F) &= \mathbf{W}_{if}\mathbf{x}_t + \mathbf{W}_{hf}\mathbf{h}_{t-1} + \mathbf{b}_f \\
G(\mathbf{h}_{t-1}, \mathbf{x}_t, \theta_G) &= \tanh(\mathbf{W}_{ig}\mathbf{x}_t + \mathbf{W}_{hg}\mathbf{h}_{t-1} + \mathbf{b}_g) \\
H(\mathbf{h}_{t-1}, \mathbf{x}_t, \theta_H) &= \tanh(\mathbf{W}_{ih}\mathbf{x}_t + \mathbf{W}_{hh}\mathbf{h}_{t-1} + \mathbf{b}_h)
\end{aligned}$$

We note that in the work that originally proposed the CfC architecture (Hasani et al., 2021),  $F$  is referred to as a liquid time constant network due to its motivation as a time constant in a dynamical system. In general, time constants are more thoroughly motivated in the continuous-time setting in which a neural network is used to model the derivative of the hidden state as opposed to the hidden state itself (Chen et al., 2018). In that setting, a time constant represents a parameter that characterizes the speed and coupling sensitivity of an ODE that models a system. However, our work exists in the discrete-time setting in which we can no longer interpret the time constant as a parameter of a continuous-time system. Instead, we interpret  $F$  as an adaptive gating mechanism, as discussed in Section 4.

If we let

$$\mathbf{y}_* = \mathbf{W}_{i*}\mathbf{x}_t + \mathbf{W}_{h*}\mathbf{h}_{t-1} + \mathbf{b}_*$$

where  $*$  is determined by the gate, then it follows that

$$\begin{aligned}
\frac{\partial \mathbf{h}_t}{\partial \mathbf{h}_{t-1}} &= \sigma(\mathbf{y}_f) \odot (1 - \tanh^2(\mathbf{y}_g)) \mathbf{W}_{hg} + \tanh(\mathbf{y}_g) \odot [\sigma(\mathbf{y}_f) \odot (1 - \sigma(\mathbf{y}_f))] \odot \mathbf{W}_{hf} \\
&\quad + [1 - \sigma(\mathbf{y}_f)] \odot (1 - \tanh^2(\mathbf{y}_h)) \mathbf{W}_{hh} + \tanh(\mathbf{y}_h) \odot [1 - (\sigma(\mathbf{y}_f) \odot (1 - \sigma(\mathbf{y}_f)))] \odot \mathbf{W}_{hf}
\end{aligned}$$

#### A.5 MOTIVATING SPECTRAL ANALYSES OF RECURRENT MODELS

In this section, we motivate the analyses employed in this paper in order to analyze the dynamics of the various recurrent networks we examined. In particular, we will motivate the low-rank, sparse parameterization of  $\mathbf{W}_{rec}$  from the perspective of modulating the spectral radius and spectral norm (and more generally the eigenspectrum and singular value spectrum) of the recurrent weights at initialization and then extend this line of reasoning to the analyses performed on the trained models. For specifics on the implementation details and computation performed for these analyses, refer to A.11.5.

### A.5.1 RECURRENT MEMORY HORIZON

We leverage our parameterization of  $\mathbf{W}_{rec}(r, s)$  as a function of rank and sparsity in order to modulate the spectral radius, spectral norm and singular value spectrum of the recurrent weights.

Here, we argue that the spectral radius of  $\mathbf{W}_{rec}(r, s)$  is a pertinent measure for the memory horizon of the network across time. We will demonstrate why in the context of an RNN as the computations are most tractable under this functional form. In particular, in an RNN, the recurrent gradient in  $\mathbf{J}_t = \frac{\partial \mathbf{h}_t}{\partial \mathbf{h}_{t-1}}$  reflects how much the network’s hidden state is updated based on information from the past. A higher recurrent gradient suggests the network is paying more attention to distant inputs during training, while a lower recurrent gradient implies less reliance on such distant information.

The relevant quantity in backpropagation through time in an RNN is

$$\frac{\partial \mathbf{h}_t}{\partial \mathbf{h}_k} = \prod_{t \geq i \geq k} \frac{\partial \mathbf{h}_i}{\partial \mathbf{h}_{i-1}} = \prod_{t \geq i \geq k} (1 - \tanh^2(\mathbf{h}_{t-1})) \odot \mathbf{W}_h$$

(refer to A.4 for details on the derivation of RNN recurrent gradient). We can re-express the element-wise product in the expression for  $\frac{\partial \mathbf{h}_i}{\partial \mathbf{h}_{i-1}}$  as the product of two matrices as follows:

$$\text{diag}[(1 - \tanh^2(\mathbf{h}_{t-1}))]\mathbf{W}_h$$

where the  $\text{diag}(v)$  operator constructs a diagonal matrix where the elements of  $v$  are placed along the diagonal. Then, we have that

$$\left\| \frac{\partial \mathbf{h}_i}{\partial \mathbf{h}_{i-1}} \right\| \leq \left\| \text{diag}[(1 - \tanh^2(\mathbf{h}_{t-1}))] \right\| \|\mathbf{W}_h\|$$

by the sub-multiplicativity of a matrix norm. As a function of rank and sparsity, if we assume that  $\left\| \text{diag}[(1 - \tanh^2(\mathbf{h}_{t-1}))] \right\|$  is reasonably unaffected by the changes in  $\mathbf{W}_{rec}(r, s)$  at initialization, then variation in the bound arises only from  $\|\mathbf{W}_h\|$ .

Drawing from the analysis presented in [Pascanu et al. \(2012\)](#), if we assume that the relevant variation in the bound as a function of rank and sparsity comes only from  $\|\mathbf{W}_h\|$  and that  $\mathbf{W}_h = \mathbf{P}\mathbf{D}\mathbf{P}^{-1}$  is diagonalizable, then we approximately have that

$$\frac{\partial \mathbf{h}_t}{\partial \mathbf{h}_k} \leq \left\| \prod_{t \geq i \geq k} \text{diag}[(1 - \tanh^2(\mathbf{h}_{i-1}))]\mathbf{W}_h \right\| \approx \|(\mathbf{W}_h)^{t-k}\| = \|\mathbf{P}\mathbf{D}^{t-k}\mathbf{P}^{-1}\|$$

where  $\mathbf{P}$  denotes a matrix of eigenvectors and  $\mathbf{D}$  denotes a diagonal matrix with the eigenvalues on the diagonal. It follows that for sufficiently large  $\ell = t - k$ ,  $\|\mathbf{P}\mathbf{D}^{t-k}\mathbf{P}^{-1}\|$  is dominated by the eigenvalue of leading magnitude. One can argue this more formally using the power iteration method, details of which can be found in [Pascanu et al. \(2012\)](#). We further note that this notion of modifying the spectral radius in order to modulate attention across the time in recurrent networks is not a new one. One prominent example can be found in echo state networks which like our parameterization induces sparsity in the recurrent weights in order to control how much attention the model pays to distant inputs.

Extending this mathematical argument to LSTMs and CfCs is less straightforward given the more intricate gating mechanisms present in the functional forms of each model. While it is reasonable to hypothesize that decreasing the spectral radius in these architectures will result in a faster decay of gradients across time, it is unclear how fast/slow this decay is relative to the analysis presented above for an RNN. Furthermore, the assumption made in the argument above for gradient decay in RNNs rested upon ignoring the portion of the gradient influenced by the hidden state:  $\left\| \text{diag}[(1 - \tanh^2(\mathbf{h}_{t-1}))] \right\|$ . This assumption becomes less reasonable after training as the network could potentially learn hidden-state vectors of small magnitude, causing the gradients to decay even faster. And this assumption is *even less reasonable* in LSTMs and CfCs after training, again due to the nuanced gating present in each architecture.

Thus, while we still examine the spectral radii of each architecture, we also conduct a more nuanced recurrent memory analysis on all the architectures by computing the norm of the recurrent gradients

backpropagated through time. In particular, if we let  $\mathbf{J}_t = \frac{\partial \mathbf{h}_t}{\partial \mathbf{h}_{t-1}}$  denote the recurrent Jacobian, then we can take the cumulative product of the Jacobians as follows:

$$[\mathbf{J}_t, \mathbf{J}_t \mathbf{J}_{t-1}, \dots, \mathbf{J}_t \mathbf{J}_{t-1} \dots \mathbf{J}_1]$$

Taking the norm of each of the matrices in the list above gives us a concrete measure of the extent to which a given model attends to its past observations as a function of time. This enables us to evaluate the effect of the recurrent weight’s spectral radius on the memory-horizon of a given architecture which allows us to make comparisons not only within a given architecture across ranks and sparsities, but also across the different recurrent architectures we analyze (i.e. RNN vs LSTM vs CfC).

#### A.5.2 ROBUSTNESS UNDER DISTRIBUTION SHIFT

In the last section, we motivated the parameterization of  $\mathbf{W}_{rec}(r, s)$  from the perspective of the spectral radius and the implications it has on the attention profile of the network across time. In this section, we will motivate the parameterization instead from the perspective of the singular value spectrum of  $\mathbf{W}_{rec}(r, s)$  and understand the implications it has on the robustness of the network under distribution shift.

Before motivating the analysis of the singular value spectrum, we first clarify the nature of the distribution shifts in the context of this work. Here, distribution shifts are applied to the input image, which is then fed through a set of convolutional layers before entering the recurrent portion of the network. The perturbed input denoted by  $\mathbf{x}_t^*$  then corrupts the hidden state  $\mathbf{h}_t^*$  via the update rule for the hidden state specified by the recurrent model. To simplify our robustness analysis, we do not consider the convolutional layers and instead restrict the scope of our analysis to the input weights and recurrent weights of the recurrent network. Since both  $\mathbf{x}_t$  and  $\mathbf{h}_t$  are affected by distribution shift, in practice we care about the robustness induced by both  $\mathbf{W}_{inp}$  and  $\mathbf{W}_{rec}$ . However, recall that our parameterization only constructs  $\mathbf{W}_{rec}(r, s)$  as a function of rank and sparsity, while maintaining the structure of  $\mathbf{W}_{inp}$  as full-rank and fully-connected. We note that we did try extending the parameterization as a function of rank and sparsity to  $\mathbf{W}_{inp}$ , but found that doing so was quite detrimental to performance (results not shown). Thus, at initialization, we only modulate the robustness across the recurrent axis via the recurrent weights. Nonetheless, we still examine the spectral properties of the input weights after training to understand whether modulating the rank and sparsity of the recurrent weights implicitly affects the input weights during learning.

Consider a perturbation  $\mathbf{e}$  applied to the hidden state  $\mathbf{h}_t$  such that  $\|\mathbf{e}\| = 1$  (in practice recall that the perturbation is actually applied to  $\mathbf{x}_t$  which later corrupts  $\mathbf{h}_t$ , but we apply the perturbation directly to  $\mathbf{h}_t$  to simplify our argument). Under distribution shift, we care about our robustness against all possible perturbations since we can imagine  $\mathbf{e}$  being sampled from some arbitrary distribution over unit vectors. In particular, we want to understand how  $\mathbf{W}_{rec}\mathbf{h}_t$  differs from  $\mathbf{W}_{rec}(\mathbf{h}_t + \mathbf{e})$ . To motivate the importance of the singular value spectrum, consider an SVD on  $\mathbf{W}_{rec}$  as follows:

$$\mathbf{W}_{rec}(\mathbf{h}_t + \mathbf{e}) = \mathbf{U}\mathbf{\Sigma}\mathbf{V}^T(\mathbf{h}_t + \mathbf{e}) = \mathbf{U}\mathbf{\Sigma}\mathbf{V}^T\mathbf{h}_t + \mathbf{U}\mathbf{\Sigma}\mathbf{V}^T\mathbf{e}$$

Note that the quantity we care about for measuring robustness is  $\mathbf{U}\mathbf{\Sigma}\mathbf{V}^T\mathbf{e}$ . Since  $\mathbf{V}^T$  is a unitary matrix,  $\mathbf{V}^T\mathbf{e} = \mathbf{e}^*$  has the same magnitude as  $\mathbf{e}$ . Similarly,  $\mathbf{U}$  is also a unitary matrix, so the only transformation that affects the magnitude of  $\mathbf{e}$  is the scaling performed by the singular value matrix  $\mathbf{\Sigma}$ . Now, we can reduce the robustness of  $\mathbf{W}_{rec}$  to two things: the magnitude of the expansion induced by  $\mathbf{\Sigma}$  and the effective number of directions in which  $\mathbf{e}$  is expanded.

First, we will discuss our approach to measuring the magnitude of the expansion induced by the recurrent weights. A canonical measure of the expansion induced by a matrix is given by the spectral norm which is equivalent to the leading singular value. In this case, the spectral norm of  $\mathbf{W}_{rec}$  tells us that  $\mathbf{W}_{rec}(\mathbf{h}_t + \mathbf{e})$  deviates most from  $\mathbf{W}_{rec}\mathbf{h}_t$  if  $\mathbf{e}$  is the norm-1 vector parallel to the singular vector corresponding to the largest singular value of  $\mathbf{W}_{rec}\mathbf{h}_t$ . We can interpret this as a worst-case (i.e. adversarial) analysis of robustness. The spectral norm of  $\mathbf{W}_{rec}$  is further tied to robustness via its relationship to the Lipschitz constant of the full network – a measure of the smoothness of the function learned by the network. In particular, a trivial upper bound for the global Lipschitz constant of a neural network is computed by multiplying the spectral norms of all the weights in the network ((Szegedy et al., 2014)). However, this has been shown in many cases to be a poor proxy for network robustness due to the looseness of the bound (Huster et al., 2018). Unfortunately,

since computing tight bounds for network-wide Lipschitz constants is NP-hard (Scaman & Virmaux, 2019), we maintain that it is reasonable to assume that a lower spectral norm in the recurrent weights results in a lower global Lipschitz constant *at initialization*. Of course, it is possible that during training, the spectral norm of other weights in the network increase and potentially counteract a decrease in the spectral norm of the recurrent weights induced at initialization. In practice, since the distribution shift is applied to the network input, it is also pertinent to analyze the input weights  $\mathbf{W}_{inp}$  in the recurrent module. One thing to note is the limitation of this analysis when making comparisons across architectures. In particular, recall that we have made the assumption that within a given architecture, across ranks and sparsities, models that have input and recurrent weights with lower spectral norms tend to express functions with lower Lipschitz constants (in which case a perturbation applied to the input would have less of an effect on the output). However, this assumption becomes less reasonable across architectures given the fact that the functional form varies significantly across RNNs, LSTMs and CfCs. Optimally, we would actually compute the Lipschitz constants in order to make such comparisons more viable, however we are unable to do this given the NP-hardness of the problem. Hence, while we still aim to make comparisons across architectures via an analysis of the spectral norm of the weights, it is important to acknowledge the potential limitation in this approach.

Next, we will discuss our approach to quantifying the effective number of directions in which  $e$  is expanded. Note that in order to remain robust against the many potential directions the perturbation vector  $e$  can lie in, it is desirable for the singular values of  $\mathbf{W}_{rec}$  to decay rapidly, as this implies that only a few singular values (i.e. only a few directions corresponding to the top singular vectors) contribute significantly to the transformation. Hence, we analyze the decay of the sorted spectrum of singular values normalized by the leading singular value as a proxy for the effective numbers of dimensions that contribute to the transformation of  $e$  by  $\mathbf{W}_{rec}$ . Again, it is possible that during training, the singular value spectrum of the input weights  $\mathbf{W}_{inp}$  counteracts the prior induced on the recurrent singular value spectrum at initialization and thus also must be examined. As with the spectral norm analysis discussed above, we also acknowledge the potential limitation in making comparisons of spectral decay across different recurrent architectures.

While the decay of the singular value spectrum provides a good proxy for the directionality component of robustness, it does so only for a single point in time. In actuality, we want to understand the directions the hidden state evolves in across the entire trajectory of our model in order to have a robustness measurement that takes into account all points in time. To do so, we perform a dimensionality analysis on the hidden state-space trajectories collected over the course of a simulation in the closed-loop environment. In particular, we are interested in three state-spaces: the recurrently-driven state-space, input-driven state-space and full state-space. A canonical state-space trajectory analysis collects the  $\mathbf{h}_t$  over time (i.e. the full state-space) and performs PCA in order to measure the effective dimensionality of the trajectory. We extend this analysis by decomposing the full state-space into the portion driven by the recurrent weights,  $\mathbf{W}_{rec}\mathbf{h}_t$  and the portion driven by the input weights  $\mathbf{W}_{inp}\mathbf{x}_t$ . This allows us to disentangle the effects of the proposed parameterization of the recurrent weights into its individual effects on the recurrent and input state-spaces. Furthermore, note that this dimensionality analysis enables us to make viable comparisons across recurrent architectures whereas this is a potential limitation of analyzing only the decay of the singular value spectra in the recurrent and input weights.

So, we have now motivated the spectral norm and decay of the singular value spectrum of both the recurrent and input weights from the perspective of constructing a model that is robust to distribution shift. This was done under the framework of assuming a perturbation applied to  $\mathbf{x}_t$  which also results in a perturbation applied to  $\mathbf{h}_t$  which affects the output decision of the model at time step  $t$ . However, we can also ask how does this perturbation affect the model into the future: namely, how does the perturbation applied to  $\mathbf{h}_t$  affect  $\mathbf{h}_{t^*}$  for  $t^* > t$ . We can answer this question by understanding how information is propagated through the network across time. But note that this is precisely the intention of analyzing the time-horizon of the recurrent memory discussed in A.5.1. So, not only does modulating the recurrent memory of the model serve the purpose of enforcing a short-horizon temporal prior necessary to model the short-term causality inherent to closed-loop environment, it also makes the network more robust across the time dimension. Thus, we have two measures of robustness: one at the current point in time and another for all time points into the future.

## A.6 THEORETICAL ANALYSIS OF SPECTRAL RADIUS AND SPECTRAL NORM AT INITIALIZATION

In this section we provide proofs for the spectral radius and spectral norm,  $\rho(\mathbf{W})$ ,  $\|\mathbf{W}\|$ , respectively, for connectivity matrices  $\mathbf{W}$  at initialization. For clarity, we iterate that  $\rho(\mathbf{W}) = \max_i |\lambda_i|$ , i.e. the largest norm of eigenvalues of  $\mathbf{W}$ , and  $\|\mathbf{W}\| = \max_i \sigma_i$ , the largest singular value of  $\mathbf{W}$ . We consider sparse networks with Glorot uniform initialization and orthogonal initialization in appendices A.6.2 and A.6.4, respectively, and orthogonal low-rank matrices in appendix A.6.3. Note that in our experiments, we only consider networks with orthogonally initialized recurrent weights which we motivate further in A.10. Also, note that in the cases where we are unable to provide proof, we still perform an empirical analysis.

### A.6.1 GLOROT UNIFORM AND SPARSE

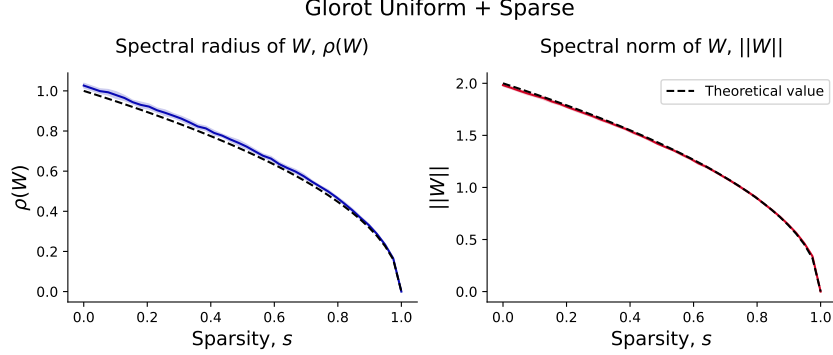

Figure 10: Spectral radius and spectral norm of uniform-sparse matrices as a function of sparsity,  $s$ , for matrices initialized with Glorot uniform initialization, with  $n = 512$ . We additionally plot the theoretical predicted value for large  $n$ .

We consider weight matrices  $\mathbf{W}$  with dimension  $n \times n$  and consider the limit as  $n \rightarrow \infty$ . Recall that Glorot uniform initialization scheme initializes weights with entries iid  $\mathbf{W}_{ij} \sim \text{Unif}\left(-\frac{\sqrt{3}}{\sqrt{n}}, +\frac{\sqrt{3}}{\sqrt{n}}\right)$ , resulting in an entry-wise variance of  $\frac{1}{n}$ . We generate a sparse matrix by element-wise multiplying a matrix,  $\mathbf{W}^0$  sampled from the Glorot uniform initialization by a sparsity map  $\mathbf{M}$ , where  $M_{ij} \sim \text{Bernoulli}(p = 1 - s)$ , with  $s$  being the sparse factor. Our final weight matrix is given by  $\mathbf{W} = \mathbf{W}^0 \odot \mathbf{M}$ . For sparsity  $s$ , the resulting variance of entries is given by  $\frac{1-s}{n}$ . As the entries of  $\mathbf{W}$  are all iid, we can apply the Girko-Ginibri circular law for large  $n$ , which states that the eigenvalues of  $\mathbf{W}$  converge to a uniform disk in the complex plane with radius  $\sqrt{1-s}$ , so we expect  $\rho(s) = \sqrt{1-s}$ . This analysis follows closely with that of [Herbert & Ostojic \(2022\)](#).

For  $\|\mathbf{W}\|$ , we apply the Marchenko-Pastur law, which states that the distribution of eigenvalues of  $\frac{1}{n} \mathbf{A} \mathbf{A}^T$  values converges to  $p_{\mathbf{A} \mathbf{A}^T}(\lambda) = \frac{1}{2\pi\sigma^2} \frac{\sqrt{(\lambda_+ - \lambda)(\lambda - \lambda_-)}}{\lambda} \mathbf{1}_{\lambda \in [\lambda_-, \lambda_+]}$ , with  $\lambda_{\pm} = \sigma^2(1 \pm 1)^2$ , if  $\mathbf{A}$  has entries iid from a distribution with zero mean and variance  $\sigma^2$ . For our setting we let  $\mathbf{A} = \sqrt{n} \mathbf{W}$ , so  $\sigma^2 = 1 - s$ . We see that the maximal eigenvalue of  $\mathbf{A} \mathbf{A}^T$  is thus  $\lambda_+ = 4(1 - s)$ , and so the upper bound for the largest singular value of  $\mathbf{W}$  is  $\|\mathbf{W}\| = 2\sqrt{1-s}$ . We observe good empirical agreement with these values in Figure 10.

### A.6.2 ORTHOGONAL AND SPARSE

In the orthogonal-sparse case, we cannot apply the same arguments in appendix A.6.4, as the entries of an orthogonal matrix are no longer iid. However, we note that the entries of orthogonal matrices are approximately Gaussian when considered individually ([Życzkowski & Sommers, 1999](#)). Thus, we expect with high sparsity, the correlations between entries break down and the entries of the matrix behave iid. Thus, we expect for large values of  $s$ ,  $\rho(\mathbf{W})$  and  $\|\mathbf{W}\|$  to have the same behavior



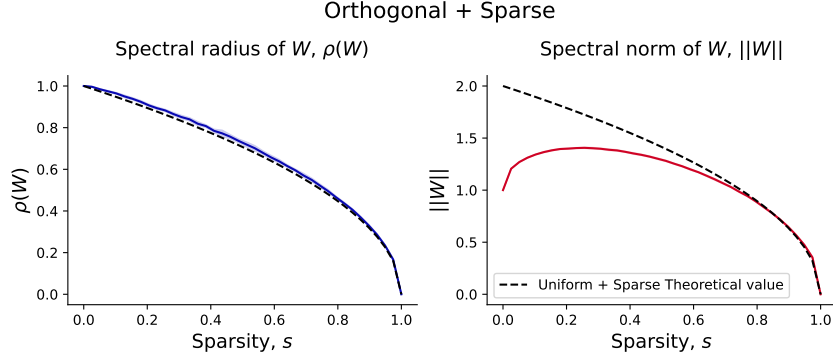

Figure 11: Spectral radius and spectral norm of orthogonal-sparse matrices as a function of sparsity,  $s$ , with  $n = 512$ . We additionally plot the theoretical predicted value for large  $n$  for the uniform-sparse initialization. We see that orthogonal-sparse matrices behave like uniform-sparse ones at high sparsities.

as in appendix A.6.4. We verify this empirically in Figure 11, where we see that for large values of  $s$ ,  $\rho(W) \approx \sqrt{1-s}$  and  $\|W\| \approx 2\sqrt{1-s}$ , as with appendix A.6.4. Interestingly,  $\|W\|$  is non-monotonic in  $s$ . Calculating the exact forms of  $\rho(W)$  and  $\|W\|$  is an interesting direction for future work.

### A.6.3 ORTHOGONAL AND LOW RANK

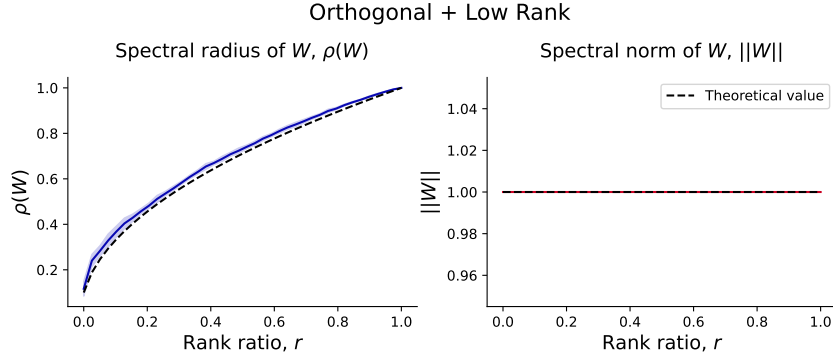

Figure 12: Spectral radius and spectral norm of orthogonal-low-rank matrices as a function of rank ratio,  $r$ , with  $n = 512$ . We additionally plot the theoretical predicted value for large  $n$ .

Recall that to generate our low rank connectivity matrix  $W$ , we first generate an orthogonal matrix  $W^0$ , then perform an SVD of it  $W = USV^T = \sum_i^n \sum_i^n u_i v_i^T$ , and then truncate it at rank  $k$  to get  $W = \sum_i^k u_i v_i^T$  with  $k \leq n$ . For  $\|W\|$ , we note that because all the singular values are 1, truncating the SVD does not change the maximum singular value so  $\|W\| = 1$  for all rank ratios  $r = \frac{k}{n}$ .

For  $\rho(W)$ , we note that one valid SVD of  $W^0$  is  $W^0 = W^0 I I$ , with  $U = W^0$ ,  $S = I$  and  $V = I$ . It is sufficient to consider this particular SVD, as other SVDs correspond to arbitrary rotations of  $U$  and  $V$ , which will not affect the final eigenvalue distribution in expectation. For this particular SVD,  $W = [W_1^0, W_2^0, \dots, W_k^0, 0, \dots, 0]$ , i.e. we take the first  $k$  columns of  $W^0$ , and replace the remaining entries with 0. Due to the large zero block in this matrix,  $W$  has the same non-zero eigenvectors and eigenvalues as the  $k \times k$  principal submatrix of  $W^0$ :  $W_{1:k, 1:k}^0$ <sup>1</sup>. Życzkowski & Sommers (1999) studies the eigenvalues of the principal submatrix of random orthogonal matrices

<sup>1</sup>for eigenvectors we need to concatenate the remaining  $n - k$  zeros to have the correct dimension

and shows that the distribution of these eigenvalues has mean  $\mathbb{E}[\lambda] = \sqrt{r}$  for rank ratio  $r = \frac{k}{n}$ . Furthermore,  $\text{Var}[\lambda] \rightarrow 0$  as  $n \rightarrow \infty$  at fixed  $r$  (Życzkowski & Sommers, 1999), so we have  $\rho(W) = \sqrt{r}$  for large  $n$ . Empirical verification of this is provided in Figure 12 for  $n = 512$ .

#### A.6.4 GLOROT UNIFORM AND LOW RANK

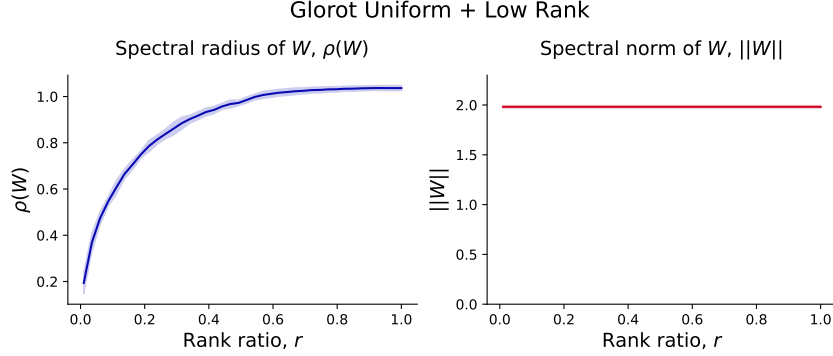

Figure 13: Spectral radius and spectral norm of uniform-low-rank matrices as a function of rank ratio,  $r$ , with  $n = 512$ .

As with the orthogonal-low-rank case, low-rank approximation does not affect the spectral norm of  $W$  when using a Glorot Uniform initialization scheme. Proving results for the spectral radius of low-rank uniform initialization is more difficult due to the more complex eigenstructure of uniformly initialized matrices compared to orthogonal ones. Thus, we leave it to future work to formally prove the relationship between rank ratio and spectral radius. We observe empirically in Figure 13 that spectral radius is increasing with rank ratio, like with the orthogonal-low-rank case.

#### A.7 SINGULAR VALUE SPECTRUM AND EIGENSPECTRUM AT INITIALIZATION

Recall in A.6, we provided theoretical results for the spectral norm and spectral radius of randomly initialized matrices as a function of rank and sparsity in order to provide theoretical guarantees regarding the proposed parameterization of the recurrent weights  $W_{rec}(r, s)$  at initialization. As explained in A.5.2, we also motivated the parameterization with respect to the entire the spectrum of singular values due to its connection with robustness. Our theoretical results regarding the spectral norm as a function of rank and sparsity do not extend to the full spectrum of singular values. So, here we provide empirical evidence regarding the decay of the singular value spectrum of the recurrent weights as a function of rank and sparsity (we also provide plots of the decay of the eigenspectrum of the recurrent weights to demonstrate the similarity between the two related, yet distinct spectra).

##### A.7.1 ORTHOGONAL INITIALIZATION

Here, we examine the singular value spectrum for the orthogonally initialized recurrent weights across various ranks and sparsities. We note that as sparsity increases, the rate at which the singular value spectrum decays decrease (Figure 14). As discussed in A.5.2, this raises the effective dimensionality of the transformation induced by the recurrent weights on the hidden-state vector. Similarly, as rank increase, the rate at which the singular value spectrum decays also decreases (Figure 14). This is interesting as increasing sparsity removes parameters from the model, whereas increases rank adds parameters to the model. Hence, we observe that pruning by increasing sparsity and pruning by decreasing rank are distinct with respect to the decay each induces in the singular value spectrum of the recurrent weights. Furthermore, note that we observe the exact same patterns with respect to the recurrent eigenspectra as well (Figure 15).

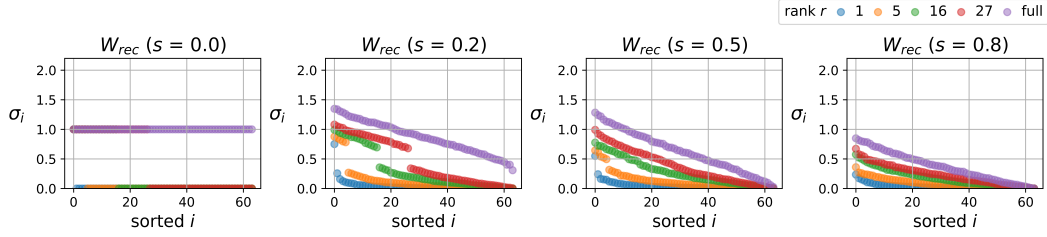

Figure 14: Singular value spectra of orthogonally initialized recurrent weights across various ranks and sparsities sorted in decreasing order.

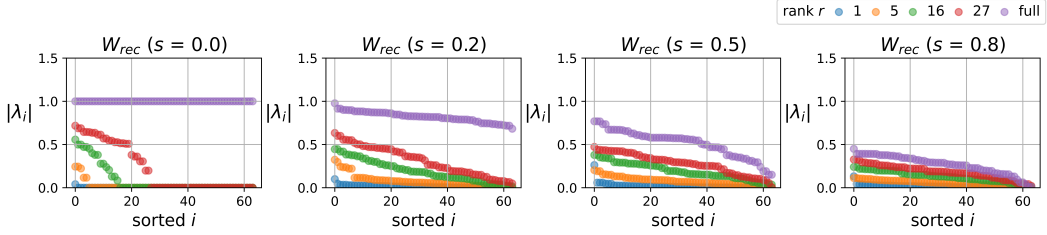

Figure 15: Eigenspectra of orthogonally initialized recurrent weights across various ranks and sparsities sorted in decreasing order.

#### A.7.2 GLOROT UNIFORM INITIALIZATION

Here, we examine the singular value spectrum for the Glorot uniform initialized recurrent weights across various ranks and sparsities. The decay patterns observed with respect to the singular value and eigenvalue spectra in the orthogonally initialized weights hold here as well (Figures 16, 17).

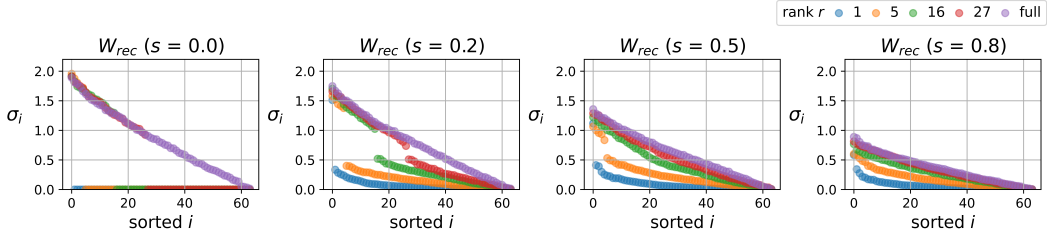

Figure 16: Singular value spectra of Glorot uniform initialized recurrent weights across various ranks and sparsities sorted in decreasing order.

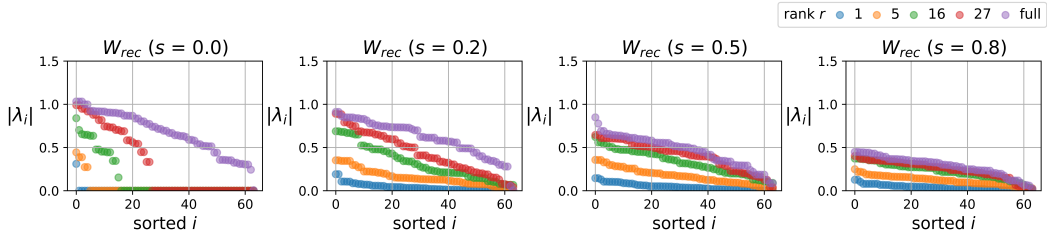

Figure 17: Eigenspectra of Glorot uniform initialized recurrent weights across various ranks and sparsities sorted in decreasing order.

## A.8 TRAINED NETWORK DYNAMICS RESULTS

In this section, we provide plots for various analyses we conducted on the trained networks that were not included in the main portion of the paper.

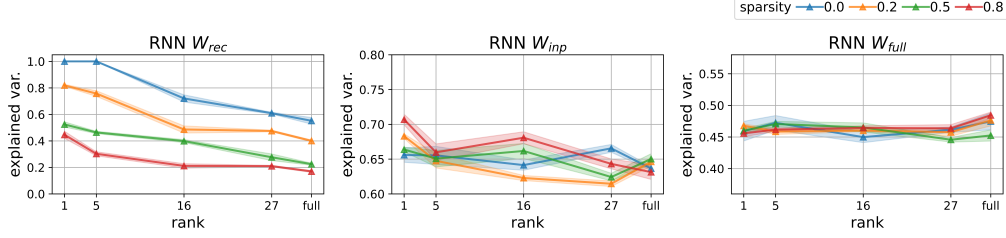

Figure 18: Effective dimensionality of RNN state-space trajectories across various ranks and sparsities. Note that the dynamics of RNNs are higher-dimensional than the dynamics we observe in CfCs. This, alongside the disparity in spectral norm, offers intuition as to why we find that CfCs tend to outperform RNNs under distribution shift.

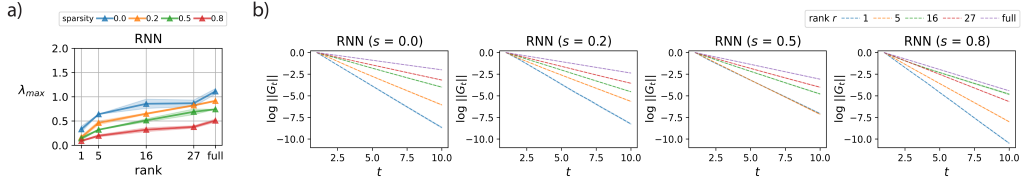

Figure 19: a) Spectral radius of recurrent weights  $W_{rec}(r, s)$  in trained RNN networks across ranks and sparsities. b) Frobenius norm of recurrent gradients  $G_t$  as a function of time. Note that the norms are plotted in log space and translated to decay from 0 to enable easier comparison. For details on the computation, refer to A.11.

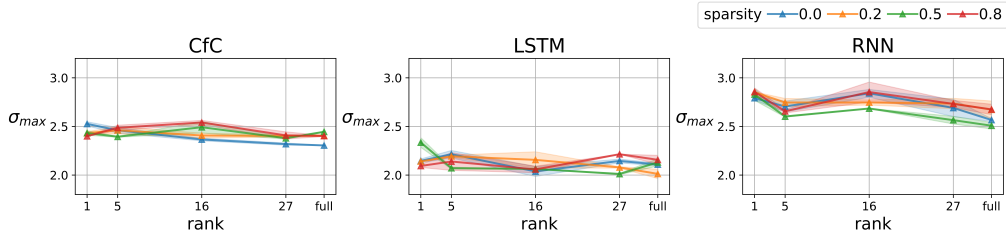

Figure 20: Spectral norm of the input weights across models, ranks and sparsities.

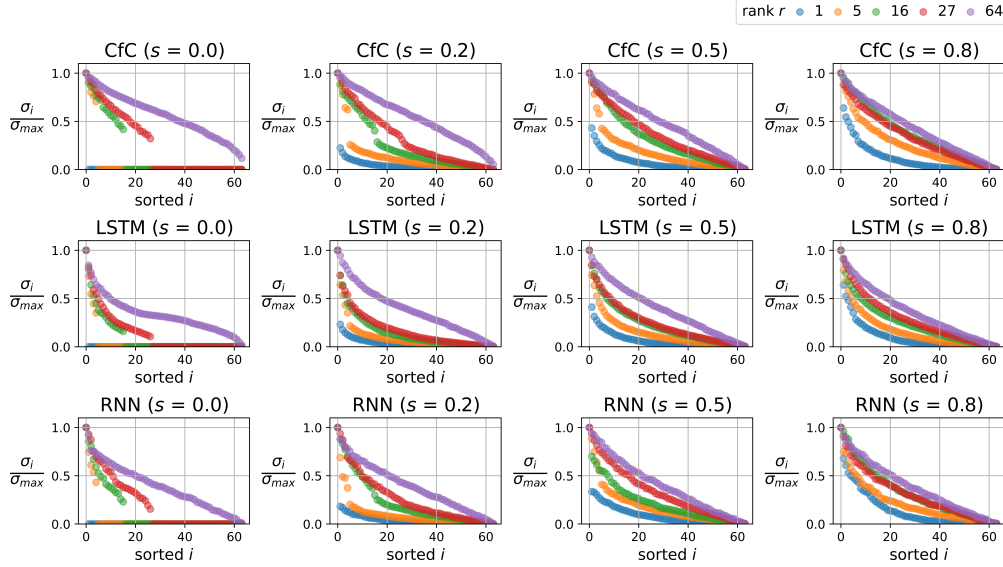

Figure 21: Decay of the recurrent singular value spectrum across models, ranks and sparsities as measured by normalizing the sorted spectrum by the spectral norm. We find that the prior induced at initialization holds at convergence: namely, as sparsity increases the rate of decay of the spectrum decreases and as rank decreases the rate of decay of the spectrum increases.

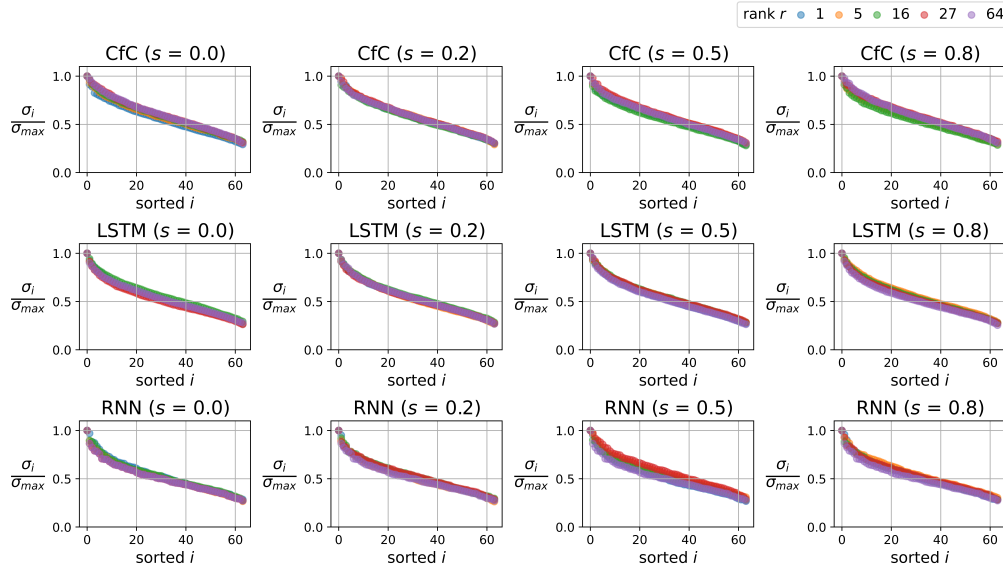

Figure 22: Decay of the input singular value spectrum across models, ranks and sparsities as measured by normalizing the sorted spectrum by the spectral norm. We find that the decay is quite similar across models, sparsities and ranks, which aligns with many of our findings suggesting that the input weights are little affected by changes in the rank and sparsity of the recurrent weights.

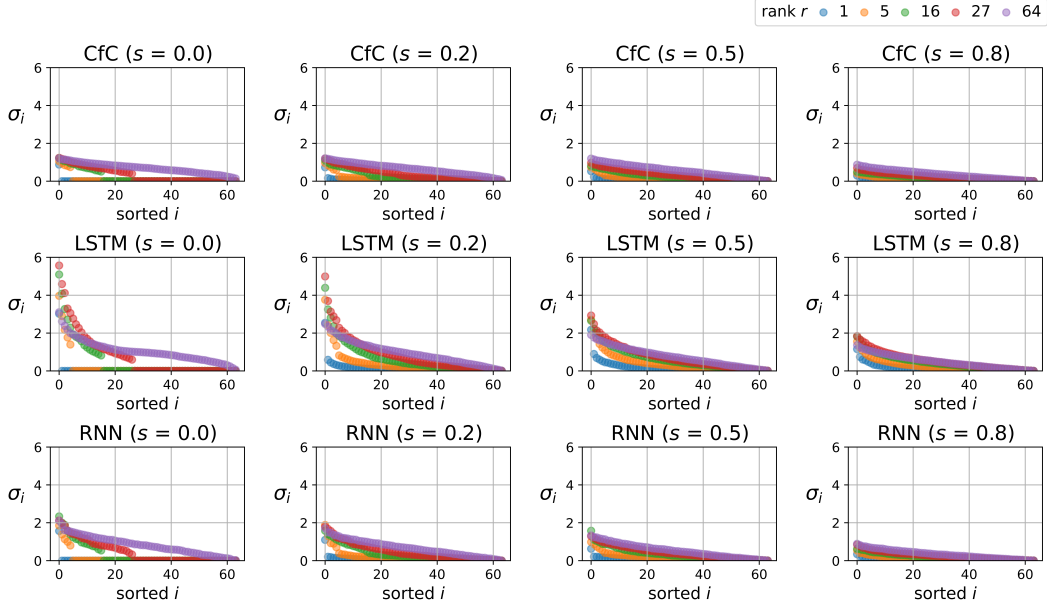

Figure 23: Singular value spectrum of the recurrent weights of the trained models across various ranks and sparsities sorted in decreasing order.

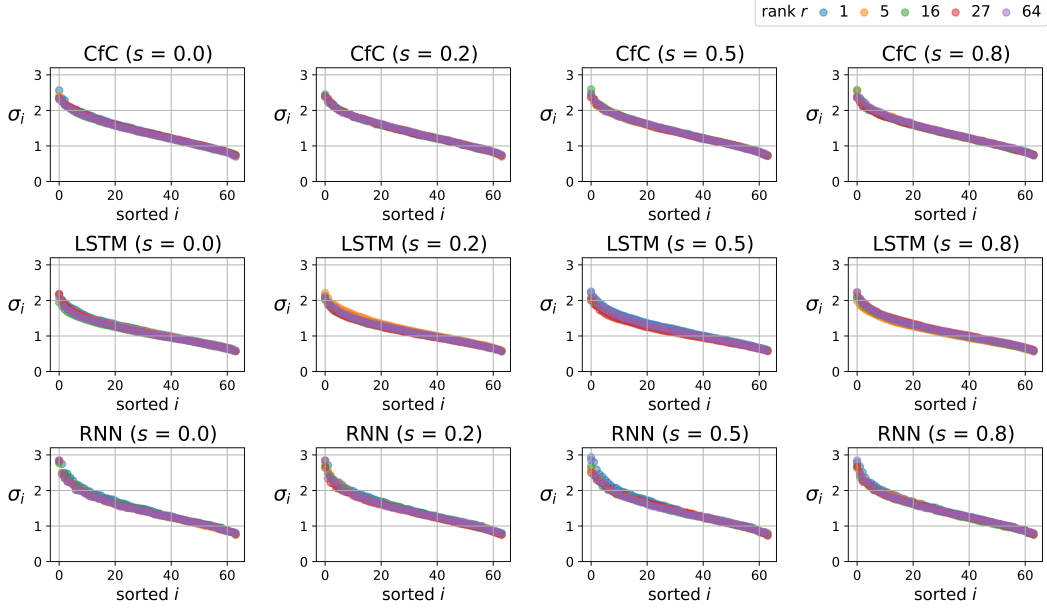

Figure 24: Singular value spectrum of the input weights of the trained models across various ranks and sparsities sorted in decreasing order.



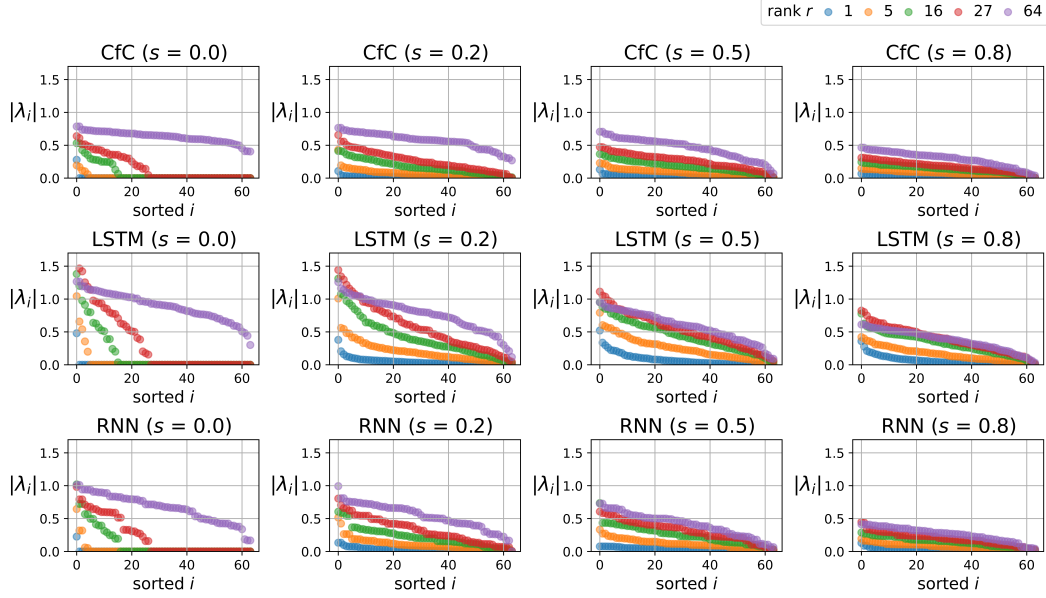

Figure 25: Eigenspectrum of the recurrent weights of the trained models across various ranks and sparsities sorted in decreasing order of magnitude.

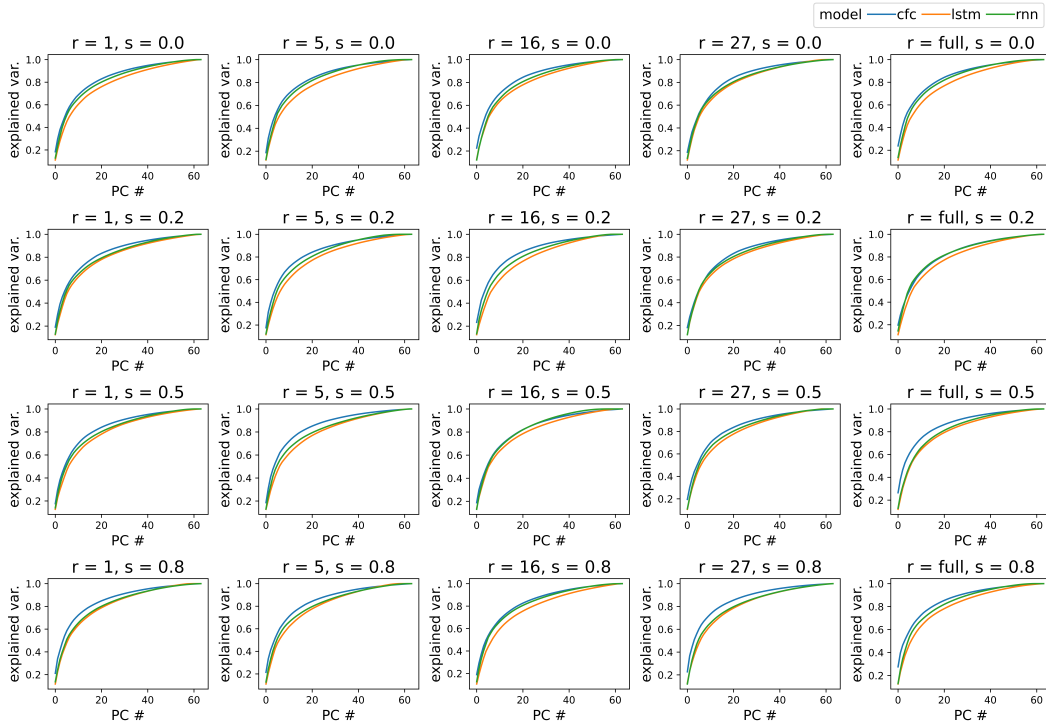

Figure 26: Dimensionality analysis of full state-space trajectories collected from the online, closed-loop in-distribution simulation analyzed in Figure 6. Here, we plot the explained variance curve over all principal components to provide a more complete view of the effective dimensionality of the trajectories, as opposed to only the top 5 PCs.

## A.9 FULL RESULTS

### A.9.1 ONLINE AND OFFLINE PERFORMANCE

Here, we provide offline validation/test loss, online in-distribution rewards and online rewards under distribution shift for each Gym environment (Brockman et al., 2016) that we ran experiments on: Seaquest, Alien and HalfCheetah. For each environment, we considered 5 types of models: CfCs, RNNs, LSTMs, GRUs and CNNs. For each of the recurrent architectures we considered models of various 5 different ranks and 4 different sparsities. Full details on the experimental setup are given in A.11.

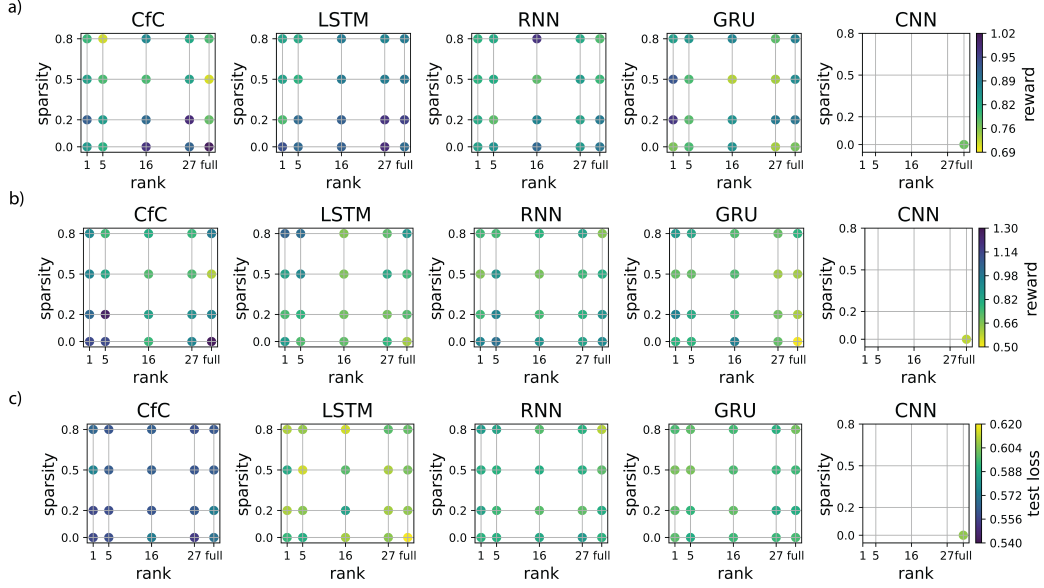

Figure 27: Online and offline performance of recurrent networks under different ranks and sparsities in the Seaquest environment. Note that online performance of Seaquest was presented in the main portion of the paper, but here we include it alongside the offline losses evaluated on validation/test set. a) In-distribution rewards in the online, closed-loop setting normalized by obtained by the expert in-distribution. b) Rewards averaged across 5 distribution shifts, normalized by rewards obtained by the expert under distribution shift. c) Loss of model evaluated on a validation/test set.

| Model | Rank | Sparsity    |             |             |             |
|-------|------|-------------|-------------|-------------|-------------|
|       |      | 0           | 0.2         | 0.5         | 0.8         |
| CfC   | 1    | 0.86 (0.03) | 0.93 (0.04) | 0.88 (0.03) | 0.8 (0.05)  |
|       | 5    | 0.81 (0.06) | 0.86 (0.05) | 0.79 (0.06) | 0.71 (0.06) |
|       | 16   | 1.01 (0.06) | 0.92 (0.06) | 0.79 (0.05) | 0.9 (0.05)  |
|       | 27   | 0.91 (0.06) | 0.97 (0.04) | 0.88 (0.06) | 0.83 (0.06) |
|       | full | 0.97 (0.04) | 0.76 (0.08) | 0.7 (0.05)  | 0.76 (0.06) |
| LSTM  | 1    | 0.99 (0.04) | 0.83 (0.04) | 0.9 (0.06)  | 0.92 (0.05) |
|       | 5    | 0.94 (0.03) | 0.94 (0.05) | 0.88 (0.06) | 0.88 (0.05) |
|       | 16   | 0.94 (0.04) | 0.94 (0.07) | 0.9 (0.06)  | 0.9 (0.07)  |
|       | 27   | 1.0 (0.03)  | 0.99 (0.05) | 0.9 (0.06)  | 0.88 (0.06) |
|       | full | 0.9 (0.05)  | 0.98 (0.03) | 0.9 (0.06)  | 0.9 (0.06)  |
| RNN   | 1    | 0.94 (0.06) | 0.92 (0.06) | 0.89 (0.05) | 0.9 (0.05)  |
|       | 5    | 0.96 (0.05) | 0.86 (0.05) | 0.94 (0.06) | 0.92 (0.06) |
|       | 16   | 0.94 (0.06) | 0.9 (0.05)  | 0.88 (0.06) | 1.07 (0.02) |
|       | 27   | 0.88 (0.05) | 0.83 (0.05) | 1.01 (0.06) | 0.91 (0.03) |
|       | full | 0.92 (0.04) | 0.92 (0.04) | 0.92 (0.05) | 0.86 (0.06) |
| GRU   | 1    | 0.81 (0.06) | 1.04 (0.04) | 1.0 (0.05)  | 0.9 (0.04)  |
|       | 5    | 0.85 (0.04) | 0.84 (0.06) | 0.85 (0.06) | 0.91 (0.04) |
|       | 16   | 0.92 (0.06) | 0.92 (0.05) | 0.78 (0.05) | 0.94 (0.05) |
|       | 27   | 0.79 (0.05) | 0.95 (0.06) | 0.79 (0.06) | 0.84 (0.05) |
|       | full | 0.82 (0.04) | 0.95 (0.06) | 0.93 (0.06) | 0.94 (0.05) |
| CNN   | 1    | —           | —           | —           | —           |
|       | 5    | —           | —           | —           | —           |
|       | 16   | —           | —           | —           | —           |
|       | 27   | —           | —           | —           | —           |
|       | full | 0.77 (0.05) | —           | —           | —           |

Table 1: Mean episodic in-distribution rewards in Seaquest environment normalized by rewards obtained by expert policy. Normalized rewards are given  $\pm 1$  SE which is shown in parentheses.

| Model | Rank | Sparsity    |             |             |             |
|-------|------|-------------|-------------|-------------|-------------|
|       |      | 0           | 0.2         | 0.5         | 0.8         |
| CfC   | 1    | 1.12 (0.05) | 1.03 (0.03) | 0.95 (0.02) | 0.93 (0.03) |
|       | 5    | 1.12 (0.03) | 1.26 (0.03) | 0.83 (0.02) | 0.76 (0.03) |
|       | 16   | 0.76 (0.03) | 0.85 (0.03) | 0.73 (0.03) | 0.8 (0.03)  |
|       | 27   | 0.95 (0.02) | 0.91 (0.03) | 0.74 (0.02) | 0.77 (0.03) |
|       | full | 1.28 (0.03) | 0.95 (0.03) | 0.59 (0.04) | 0.98 (0.03) |
| LSTM  | 1    | 0.77 (0.03) | 0.68 (0.04) | 0.76 (0.03) | 0.91 (0.02) |
|       | 5    | 0.67 (0.04) | 0.71 (0.04) | 0.82 (0.03) | 0.89 (0.02) |
|       | 16   | 0.66 (0.05) | 0.64 (0.04) | 0.62 (0.05) | 0.62 (0.05) |
|       | 27   | 0.7 (0.04)  | 0.63 (0.05) | 0.74 (0.04) | 0.66 (0.05) |
|       | full | 0.58 (0.05) | 0.67 (0.04) | 0.69 (0.04) | 0.78 (0.05) |
| RNN   | 1    | 0.78 (0.02) | 0.96 (0.02) | 0.7 (0.04)  | 0.87 (0.02) |
|       | 5    | 0.78 (0.02) | 0.82 (0.02) | 0.7 (0.03)  | 0.83 (0.03) |
|       | 16   | 0.96 (0.02) | 0.76 (0.03) | 0.73 (0.03) | 0.73 (0.03) |
|       | 27   | 0.71 (0.04) | 0.68 (0.04) | 0.62 (0.04) | 0.71 (0.04) |
|       | full | 0.51 (0.03) | 0.61 (0.04) | 0.61 (0.04) | 0.78 (0.04) |
| GRU   | 1    | 0.8 (0.05)  | 0.67 (0.05) | 0.61 (0.04) | 0.67 (0.04) |
|       | 5    | 0.84 (0.05) | 0.8 (0.05)  | 0.76 (0.04) | 0.66 (0.04) |
|       | 16   | 0.76 (0.04) | 0.66 (0.04) | 0.62 (0.04) | 0.69 (0.04) |
|       | 27   | 0.73 (0.05) | 0.69 (0.04) | 0.67 (0.04) | 0.73 (0.04) |
|       | full | 0.78 (0.04) | 0.76 (0.04) | 0.7 (0.04)  | 0.6 (0.04)  |
| CNN   | 1    | —           | —           | —           | —           |
|       | 5    | —           | —           | —           | —           |
|       | 16   | —           | —           | —           | —           |
|       | 27   | —           | —           | —           | —           |
|       | full | 0.58 (0.04) | —           | —           | —           |

Table 2: Mean episodic rewards under distribution shift in Seaquest environment normalized by performance of the expert policy under distribution shift. Rewards are given  $\pm 1$  SE which is shown in parentheses.

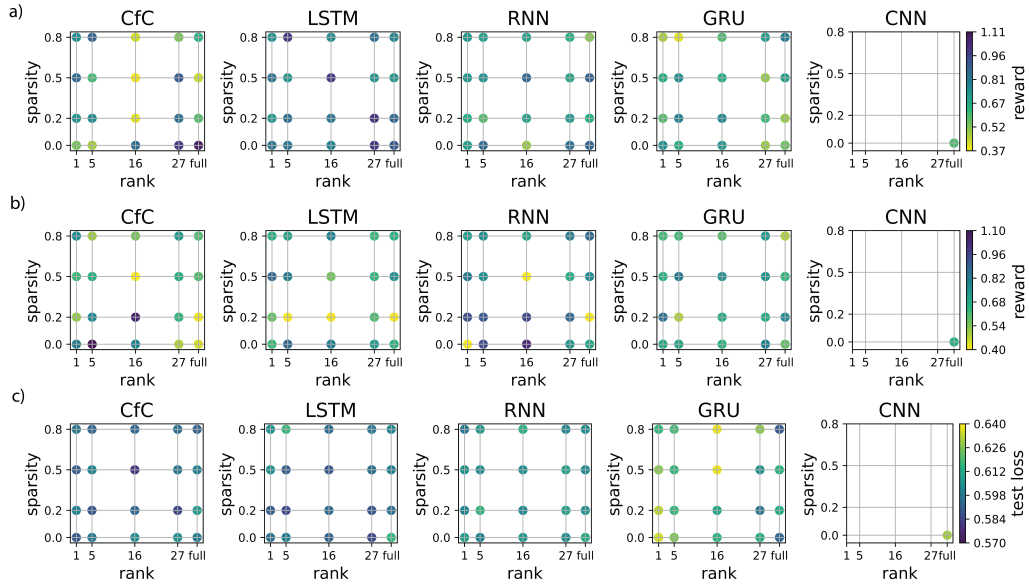

Figure 28: Online and offline performance of recurrent networks under different ranks and sparsities in the Alien environment. a) In-distribution rewards in the online, closed-loop setting normalized by expert's reward. b) Rewards averaged across 5 distribution shifts, normalized by rewards obtained by the expert under distribution shift. c) Loss of model evaluated on a validation/test set.

| Model | Rank | Sparsity    |             |             |             |
|-------|------|-------------|-------------|-------------|-------------|
|       |      | 0           | 0.2         | 0.5         | 0.8         |
| CfC   | 1    | 0.59 (0.07) | 0.81 (0.14) | 0.95 (0.11) | 0.83 (0.19) |
|       | 5    | 0.52 (0.1)  | 0.84 (0.14) | 0.66 (0.13) | 0.98 (0.14) |
|       | 16   | 0.94 (0.14) | 0.45 (0.05) | 0.42 (0.05) | 0.47 (0.04) |
|       | 27   | 1.1 (0.18)  | 0.94 (0.19) | 1.01 (0.17) | 0.58 (0.08) |
|       | full | 1.2 (0.21)  | 0.64 (0.12) | 0.47 (0.07) | 0.7 (0.11)  |
| LSTM  | 1    | 0.92 (0.12) | 0.8 (0.12)  | 0.92 (0.12) | 0.81 (0.12) |
|       | 5    | 0.9 (0.12)  | 0.93 (0.15) | 0.8 (0.15)  | 1.1 (0.18)  |
|       | 16   | 0.87 (0.13) | 0.9 (0.12)  | 1.09 (0.13) | 0.84 (0.16) |
|       | 27   | 1.11 (0.14) | 1.12 (0.15) | 0.8 (0.14)  | 0.92 (0.12) |
|       | full | 1.0 (0.14)  | 0.95 (0.14) | 1.15 (0.12) | 0.88 (0.17) |
| RNN   | 1    | 0.77 (0.12) | 0.73 (0.11) | 0.8 (0.1)   | 0.8 (0.11)  |
|       | 5    | 0.96 (0.11) | 0.64 (0.11) | 0.82 (0.1)  | 0.78 (0.14) |
|       | 16   | 0.54 (0.1)  | 0.76 (0.11) | 0.97 (0.06) | 0.76 (0.11) |
|       | 27   | 0.92 (0.11) | 0.79 (0.12) | 0.75 (0.1)  | 0.71 (0.11) |
|       | full | 0.97 (0.09) | 0.71 (0.13) | 0.97 (0.11) | 0.57 (0.1)  |
| GRU   | 1    | 0.81 (0.11) | 0.64 (0.11) | 0.71 (0.11) | 0.52 (0.11) |
|       | 5    | 0.72 (0.09) | 0.87 (0.12) | 0.83 (0.12) | 0.44 (0.06) |
|       | 16   | 0.8 (0.1)   | 0.86 (0.11) | 0.72 (0.1)  | 0.64 (0.12) |
|       | 27   | 0.54 (0.1)  | 0.67 (0.11) | 0.55 (0.1)  | 0.79 (0.11) |
|       | full | 0.6 (0.1)   | 0.54 (0.12) | 0.77 (0.14) | 0.89 (0.11) |
| CNN   | 1    | —           | —           | —           | —           |
|       | 5    | —           | —           | —           | —           |
|       | 16   | —           | —           | —           | —           |
|       | 27   | —           | —           | —           | —           |
|       | full | 0.64 (0.09) | —           | —           | —           |

Table 3: Mean episodic in-distribution rewards in Alien environment normalized by rewards obtained by expert policy. Normalized rewards are given  $\pm 1$  SE which is shown in parentheses.



| Model | Rank | Sparsity    |             |             |             |
|-------|------|-------------|-------------|-------------|-------------|
|       |      | 0           | 0.2         | 0.5         | 0.8         |
| CfC   | 1    | 0.81 (0.04) | 0.52 (0.02) | 0.62 (0.03) | 0.77 (0.05) |
|       | 5    | 1.1 (0.02)  | 0.78 (0.02) | 0.67 (0.02) | 0.51 (0.03) |
|       | 16   | 0.8 (0.02)  | 1.05 (0.05) | 0.3 (0.02)  | 0.55 (0.03) |
|       | 27   | 0.48 (0.02) | 0.64 (0.02) | 0.66 (0.02) | 0.73 (0.01) |
|       | full | 0.44 (0.01) | 0.41 (0.02) | 0.6 (0.03)  | 0.6 (0.02)  |
| LSTM  | 1    | 0.63 (0.03) | 0.58 (0.05) | 0.88 (0.05) | 0.66 (0.06) |
|       | 5    | 0.87 (0.06) | 0.08 (0.0)  | 0.81 (0.06) | 0.69 (0.05) |
|       | 16   | 0.81 (0.06) | 0.08 (0.0)  | 0.56 (0.03) | 0.8 (0.04)  |
|       | 27   | 0.72 (0.06) | 0.6 (0.05)  | 0.64 (0.05) | 0.63 (0.05) |
|       | full | 0.65 (0.06) | 0.3 (0.01)  | 0.76 (0.06) | 0.66 (0.04) |
| RNN   | 1    | 0.68 (0.03) | 0.84 (0.05) | 0.65 (0.03) | 0.62 (0.03) |
|       | 5    | 0.69 (0.06) | 0.48 (0.04) | 0.82 (0.05) | 0.62 (0.04) |
|       | 16   | 0.65 (0.03) | 0.68 (0.05) | 0.76 (0.05) | 0.6 (0.04)  |
|       | 27   | 0.8 (0.04)  | 0.67 (0.05) | 0.74 (0.06) | 0.72 (0.05) |
|       | full | 0.58 (0.04) | 0.77 (0.04) | 0.64 (0.05) | 0.49 (0.02) |
| GRU   | 1    | 0.1 (0.0)   | 0.94 (0.05) | 0.82 (0.03) | 0.71 (0.04) |
|       | 5    | 0.95 (0.05) | 0.92 (0.08) | 0.76 (0.05) | 0.77 (0.05) |
|       | 16   | 1.04 (0.03) | 0.95 (0.05) | 0.08 (0.0)  | 0.69 (0.03) |
|       | 27   | 0.73 (0.04) | 0.87 (0.05) | 0.67 (0.05) | 0.82 (0.07) |
|       | full | 0.69 (0.05) | 0.08 (0.0)  | 0.78 (0.03) | 0.86 (0.05) |
| CNN   | 1    | —           | —           | —           | —           |
|       | 5    | —           | —           | —           | —           |
|       | 16   | —           | —           | —           | —           |
|       | 27   | —           | —           | —           | —           |
|       | full | 0.67 (0.04) | —           | —           | —           |

Table 4: Mean episodic rewards under distribution shift in Alien environment normalized by performance of the expert policy under distribution shift. Rewards are given  $\pm 1$  SE which is shown in parentheses.

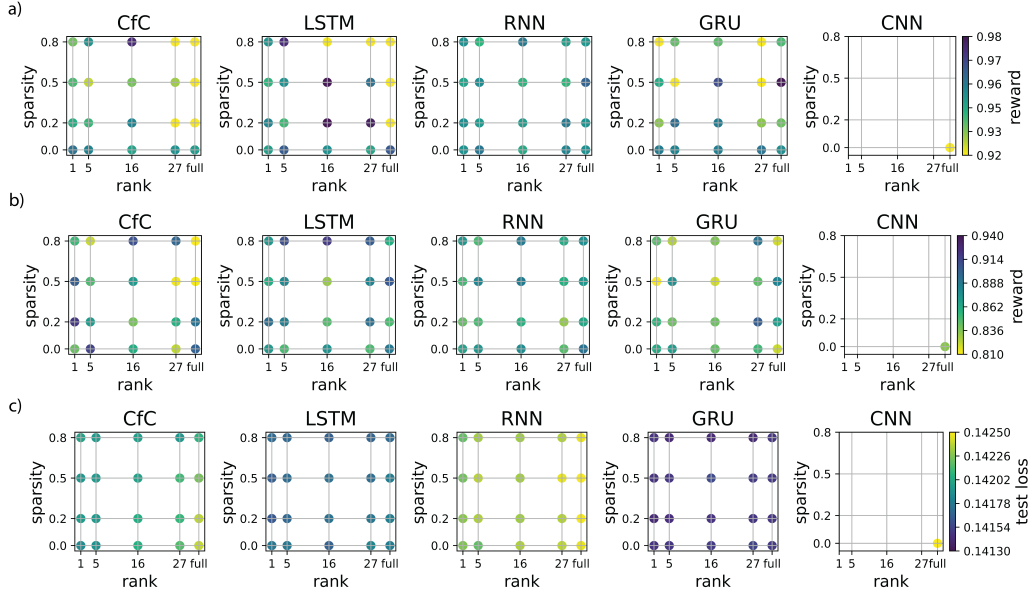

Figure 29: Online and offline performance of recurrent networks under different ranks and sparsities in the HalfCheetah environment. a) In-distribution rewards in the online, closed-loop setting normalized by expert's reward. b) Rewards averaged across 5 distribution shifts, normalized by rewards obtained by the expert under distribution shift. c) Loss of model evaluated on a validation/test set.

| Model | Rank | Sparsity      |               |               |               |
|-------|------|---------------|---------------|---------------|---------------|
|       |      | 0             | 0.2           | 0.5           | 0.8           |
| CfC   | 1    | 0.945 (0.005) | 0.929 (0.003) | 0.924 (0.004) | 0.92 (0.003)  |
|       | 5    | 0.941 (0.003) | 0.926 (0.003) | 0.91 (0.002)  | 0.936 (0.002) |
|       | 16   | 0.932 (0.002) | 0.941 (0.003) | 0.919 (0.002) | 0.963 (0.005) |
|       | 27   | 0.937 (0.004) | 0.874 (0.004) | 0.914 (0.003) | 0.883 (0.004) |
|       | full | 0.934 (0.003) | 0.816 (0.006) | 0.877 (0.002) | 0.847 (0.003) |
| LSTM  | 1    | 0.933 (0.003) | 0.94 (0.003)  | 0.927 (0.003) | 0.936 (0.003) |
|       | 5    | 0.95 (0.003)  | 0.925 (0.004) | 0.937 (0.002) | 0.962 (0.003) |
|       | 16   | 0.937 (0.003) | 0.991 (0.003) | 0.968 (0.005) | 0.905 (0.003) |
|       | 27   | 0.931 (0.003) | 0.965 (0.004) | 0.945 (0.003) | 0.872 (0.003) |
|       | full | 0.951 (0.003) | 0.875 (0.003) | 0.889 (0.008) | 0.842 (0.009) |
| RNN   | 1    | 0.943 (0.004) | 0.917 (0.007) | 0.93 (0.005)  | 0.903 (0.003) |
|       | 5    | 0.941 (0.003) | 0.946 (0.003) | 0.885 (0.003) | 0.921 (0.003) |
|       | 16   | 0.941 (0.002) | 0.942 (0.003) | 0.954 (0.003) | 0.922 (0.004) |
|       | 27   | 0.944 (0.003) | 0.917 (0.003) | 0.9 (0.029)   | 0.861 (0.006) |
|       | full | 0.938 (0.003) | 0.92 (0.002)  | 0.971 (0.003) | 0.924 (0.021) |
| GRU   | 1    | 0.937 (0.002) | 0.938 (0.004) | 0.932 (0.003) | 0.937 (0.002) |
|       | 5    | 0.944 (0.002) | 0.935 (0.003) | 0.938 (0.003) | 0.927 (0.003) |
|       | 16   | 0.93 (0.003)  | 0.934 (0.003) | 0.927 (0.003) | 0.943 (0.003) |
|       | 27   | 0.94 (0.002)  | 0.943 (0.003) | 0.926 (0.011) | 0.934 (0.001) |
|       | full | 0.937 (0.004) | 0.936 (0.003) | 0.949 (0.003) | 0.935 (0.002) |
| CNN   | 1    | —             | —             | —             | —             |
|       | 5    | —             | —             | —             | —             |
|       | 16   | —             | —             | —             | —             |
|       | 27   | —             | —             | —             | —             |
|       | full | 0.90 (0.003)  | —             | —             | —             |

Table 5: Mean episodic in-distribution rewards in HalfCheetah environment normalized by rewards obtained by expert policy. Normalized rewards are given  $\pm 1$  SE which is shown in parentheses.

| Model | Rank | Sparsity      |               |               |               |
|-------|------|---------------|---------------|---------------|---------------|
|       |      | 0             | 0.2           | 0.5           | 0.8           |
| CfC   | 1    | 0.842 (0.009) | 0.919 (0.001) | 0.903 (0.003) | 0.852 (0.004) |
|       | 5    | 0.915 (0.002) | 0.869 (0.007) | 0.848 (0.004) | 0.82 (0.005)  |
|       | 16   | 0.86 (0.007)  | 0.838 (0.008) | 0.871 (0.003) | 0.908 (0.0)   |
|       | 27   | 0.822 (0.008) | 0.858 (0.001) | 0.813 (0.006) | 0.898 (0.003) |
|       | full | 0.9 (0.001)   | 0.891 (0.005) | 0.812 (0.006) | 0.795 (0.003) |
| LSTN  | 1    | 0.871 (0.001) | 0.894 (0.0)   | 0.86 (0.003)  | 0.872 (0.004) |
|       | 5    | 0.849 (0.006) | 0.885 (0.001) | 0.88 (0.0)    | 0.909 (0.003) |
|       | 16   | 0.875 (0.002) | 0.847 (0.008) | 0.83 (0.006)  | 0.918 (0.001) |
|       | 27   | 0.848 (0.006) | 0.893 (0.002) | 0.882 (0.0)   | 0.903 (0.003) |
|       | full | 0.888 (0.001) | 0.848 (0.004) | 0.905 (0.001) | 0.86 (0.003)  |
| RNN   | 1    | 0.861 (0.003) | 0.854 (0.002) | 0.806 (0.009) | 0.846 (0.003) |
|       | 5    | 0.87 (0.003)  | 0.841 (0.006) | 0.875 (0.001) | 0.824 (0.008) |
|       | 16   | 0.843 (0.006) | 0.841 (0.007) | 0.819 (0.009) | 0.836 (0.005) |
|       | 27   | 0.852 (0.004) | 0.903 (0.004) | 0.844 (0.006) | 0.891 (0.0)   |
|       | full | 0.82 (0.009)  | 0.869 (0.002) | 0.884 (0.0)   | 0.819 (0.009) |
| LSTM  | 1    | 0.866 (0.001) | 0.843 (0.003) | 0.85 (0.003)  | 0.872 (0.001) |
|       | 5    | 0.872 (0.003) | 0.849 (0.006) | 0.882 (0.0)   | 0.849 (0.004) |
|       | 16   | 0.878 (0.002) | 0.858 (0.006) | 0.887 (0.001) | 0.888 (0.001) |
|       | 27   | 0.846 (0.004) | 0.831 (0.007) | 0.859 (0.004) | 0.862 (0.004) |
|       | full | 0.891 (0.001) | 0.864 (0.0)   | 0.872 (0.003) | 0.877 (0.001) |
| CNN   | 1    | —             | —             | —             | —             |
|       | 5    | —             | —             | —             | —             |
|       | 16   | —             | —             | —             | —             |
|       | 27   | —             | —             | —             | —             |
|       | full | 0.836 (0.003) | —             | —             | —             |

Table 6: Mean episodic rewards under distribution shift in HalfCheetah environment normalized by performance of the expert policy under distribution shift. Rewards are given  $\pm 1$  SE which is shown in parentheses.

## A.10 INITIALIZATION OF RECURRENT WEIGHTS

We leverage an initialization scheme consistent across each of the recurrent networks in order to control for potential confounding effects that could arise due to differences present in the default initializers for the recurrent weights. We will first discuss what the default initialization scheme looks like for the recurrent networks we considered and then motivate our proposed method of initialization.

**Default initialization schemes.** We define the default initialization schemes of recurrent weights in RNNs, LSTMs and GRUs as those implemented by TensorFlow (Abadi et al., 2016) and the default initialization of recurrent weights in a CfC as given by the open-source implementation presented in Hasani et al. (2021). The default initializers for these models differ in a couple key areas. For one, RNNs, LSTMs and GRUs are orthogonally initialized whereas CfCs are initialized from a Glorot uniform distribution.

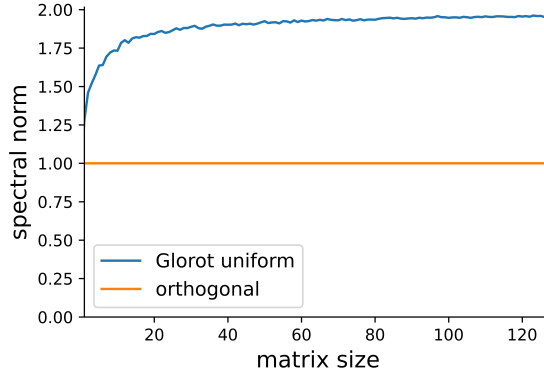

Figure 30: Spectral norm of random square matrices drawn from orthogonal and Glorot uniform distributions for various sized matrices.

In Figure 30, we investigate the spectral norm of random matrices drawn from orthogonal and Glorot uniform distributions. Due to the significant disparity between the spectral norms inherent to the distributions, we opt to standardize the initialization scheme across all recurrent models by drawing the weights from an orthogonal distribution. We motivate this further in the description of our initializer.

Another concern is that RNNs, LSTMs and GRUs are distinct with respect to how they are orthogonally initialized: in particular, consider  $[W_0]$ ,  $[W_0, W_1, W_2, W_3]$ ,  $[W_0, W_1, W_2]$  which represent the concatenated recurrent weights in RNNs, LSTMs and GRUs respectively. Rather than initialize each  $W_i$  to be orthogonal, TensorFlow draws the concatenated set of matrices from an orthogonal distribution. The following result demonstrates why this is problematic in the context of our work.

**Lemma 1.** Consider matrices  $A \in \mathbb{R}^{n \times p}$  and  $B \in \mathbb{R}^{n \times q}$ . Let  $C = [A \ B]$  denote the concatenation of the two matrices. Then,  $\|A\| \leq \|C\|$  and  $\|B\| \leq \|C\|$  where  $\|\cdot\|$  denotes the spectral norm.

*Proof.* We will first consider the case of matrix  $A$ . By definition,  $\|A\| = \sup_{x \neq 0} \frac{\|Ax\|}{\|x\|}$ . If we constrain  $x$  to be of unit norm, then  $\|A\| = \sup_{x \neq 0} \|Ax\|$ . Let  $z$  denote the unit norm vector that maximizes  $\|Ax\|$ . Then, we can construct another vector  $m = [z \ 0 \ 0 \ \dots \ 0]$  which represents the concatenation of  $z$  which contains  $p$  entries and a zero-vector which contains  $q$  entries. Note that by construction  $m$  is also unit norm. It follows that  $\|Az\| \leq \|Cm\|$  which means that the maximum attainable value of  $\|Cx\|$  is greater than or equal to the maximum attainable value of  $\|Ax\|$  over all unit vectors  $x$ . Thus,  $\|A\| \leq \|C\|$ . An analogous argument can be made to show that  $\|B\| \leq \|C\|$ .  $\square$

By Lemma 1, it follows that the default initialization in LSTMs and GRUs produces submatrices  $W_i$  with spectral norm less than the spectral norm of the default initialized recurrent weights in RNNs. We will address this discrepancy in our proposed initialization scheme.

**Orthogonal spectral-initialization scheme.** Orthogonal spectral-initialization refers to the initialization scheme we utilized for the models in all the results we presented. First and foremost, this standardizes the distribution of the recurrent weights to be orthogonal. Note that we also formalize an analogous initializer which we call Glorot uniform spectral-initialization which is detailed in the next subsection.

In practice, we use the orthogonal distribution as it leans on the intuition of our connectivity prior in which we show empirically that networks initialized at lower spectral norms tends to converge to solutions with lower spectral norms as well. Because we care about the robustness of the network as measured by spectral norm at convergence and found that orthogonal weights have lower spectral norm than Glorot uniform ones (Figure 30), we opt to draw from the orthogonal distribution.

With respect to the concatenation issue discussed above, we address this by instead drawing each recurrent weight matrix from an orthogonal distribution as opposed to drawing the full, concatenated set of matrices from one. This ensures equivalent spectral norms across all recurrent weights and models.

Finally, the spectral-initialization refers specifically to the rank- $r$  SVD performed on the full-rank weights  $\mathbf{W}_{rec}$  to generate  $\mathbf{W}_1, \mathbf{W}_2$  (Section 3.1) for training. We opted to perform a spectral decomposition as opposed to drawing  $\mathbf{W}_1$  and  $\mathbf{W}_2$  from orthogonal distributions individually because  $\mathbf{W}_1 \mathbf{W}_2$  is no longer orthogonally distributed. In addition, note that multiplying the two matrices does not preserve the spectral norm of  $\mathbf{W}_{rec}$ . In contrast, by the Eckhart-Young-Minsky theorem, a rank- $r$  SVD is the most efficient approximation of  $\mathbf{W}_{rec}$  under the spectral norm.

Note that the drawback of this initialization scheme is that we are unable to prove all the results posed in Theorem 1 due to the dependence between entries in an orthogonal matrix (appendix A.6.2). In contrast, we are able to prove Theorem 1 in the case of uniformly distributed matrices, which we motivate next.

**Glorot uniform spectral-initialization scheme.** The Glorot uniform spectral-initializer refers to the same construction as the orthogonal spectral-initializer, except recurrent weights are drawn from Glorot uniform distributions instead. Note that this distribution is valuable if one wants theoretical guarantees for all the properties given in Theorem 1. However, this comes at the cost of empirically less robust models as evidenced by the learned weights possessing higher spectral norm relative to their orthogonally initialized counterparts (results not shown).

## A.11 DETAILS OF EXPERIMENTAL SETUP

In this section, we extensively detail each of the experiments and analyses that were presented in the main portion of the paper.

### A.11.1 GENERATING EXPERT TRAJECTORIES

**Arcade learning environments.** Within the set of ALEs, we considered the Seaquest and Alien environments. These environments in particular were chosen as we were able to train reinforcement learning agents that achieved performance competitive to state-of-the-art using out-of-the-box models provided by RLlib (Liang et al., 2017). For the ALEs, we train an Ape-X DQN (Horgan et al., 2018b) model using the Atari pre-processing framework detailed in Horgan et al. (2018b). We employ the default implementation of the Ape-X DQN model given by RLlib which is a tuned version of the model presented in Horgan et al. (2018b). After the model is trained to perform sufficiently well in the environment, we use it to generate expert trajectories. Specifically, we generate 100 rollouts of the trained model’s observations and actions taken in the environment which were later used to fit the recurrent models we examine in an imitation learning framework.

**MuJoCo.** Within the set of MuJoCo environments, we considered the HalfCheetah environment. Again, this environment was chosen based on its amenability to models provided by RLlib. For the MuJoCo environment, we employ an implementation of proximal policy optimization (PPO) given by RLlib (Schulman et al., 2017). We also leverage the default set of hyperparameters given by RLlib to train the model. As we did with the ALEs, we generate 100 rollouts of the trained model’s observations and actions taken in the environment which were later used to fit the recurrent models using imitation learning.



### A.11.2 IMITATION LEARNING FRAMEWORK

For each recurrent architecture, we construct a model to be fit offline on the generated expert trajectories. We have layers in the network that act to preprocess the observations before entering the recurrent portion of the network as well as output layers from the recurrent portion in accordance to the action space specified by the environments. Since the observation and action spaces in ALEs and MuJoCo environments are distinct, we construct different network architectures for each.

First, we consider the network architectures used for ALEs. In their raw form, observations are given by a  $210 \times 160 \times 3$  dimensional image, but they are preprocessed using the Atari preprocessing specified by [Horgan et al. \(2018b\)](#). This yields new observations of dimension  $84 \times 84 \times 3$  which are used as inputs to the model.

| layer type          | activation |
|---------------------|------------|
| Conv(64, k=5, s=2)  | relu       |
| Conv(128, k=5, s=2) | relu       |
| Conv(128, k=5, s=2) | relu       |
| AveragePooling      | none       |
| TimeDistributed     | none       |
| recurrentNet        | none       |
| FC(numActions)      | softmax    |

Table 7: ALE network architecture

In the table above,  $k$  denotes the kernel size and  $s$  denotes the stride of the convolution. recurrentNet refers to the recurrent network module that was varied and is discussed in further detail below. numActions refers to the number of actions the agent can take in the environment. Since the action space is a discrete categorical variable that can take on numActions different values, the network is trained using categorical cross-entropy loss. We detail the model hyperparameters and corresponding grid search in A.11.3.

Next, we will consider the network architecture employed for MuJoCo networks.

| layer type      | activation |
|-----------------|------------|
| FC(256)         | relu       |
| FC(256)         | relu       |
| TimeDistributed | none       |
| recurrentNet    | none       |
| FC(numActions)  | tanh       |

Table 8: MuJoCo network architecture

Since the action space for MuJoCo environments is continuous, the output is a continuous variable that can take on numActions different values and the network is trained using MSE loss. Furthermore, since the action space is bounded within the interval  $[-1, 1]$ , a tanh activation function is applied to the output layer.

### A.11.3 MODEL HYPERPARAMETERS

Below is a table with the model hyperparameters that were used in both the ALE networks and MuJoCo networks. Parameters in square brackets represent a grid search over which the best performing model was chosen. Note that only offline performance on the validation/test set was used to determine the best performing model in the grid search. Parameters in curly braces are dimensions across which the network was individually evaluated for comparison.

The architecture of the convolutional head in the ALE networks was used on the basis of work presented in [Lechner et al. \(2022\)](#) which conducting extensive grid searching across convolutional architectures over many ALEs. Analogously, the dense head used in the MuJoCo architecture was drawn from [Hasani et al. \(2021\)](#).

| hyperparameter | value                                     |
|----------------|-------------------------------------------|
| optimizer      | Adam ( $\beta_1 = 0.9, \beta_2 = 0.999$ ) |
| hidden size    | 64                                        |
| learning rate  | $[5 * 10^{-5}, 1 * 10^{-4}, 5 * 10^{-4}]$ |
| epochs         | 150                                       |
| rank           | $\{1, 5, 16, 27, \text{full}\}$           |
| sparsity       | $\{0, 0.2, 0.5, 0.8\}$                    |

Table 9: Model hyperparameters

In all the environments, we considered models of rank 1, 5, 16, 27, full and sparsities of 0, 0.2, 0.5, 0.8. Note that the recurrent weights in the full rank networks are not rank decomposed, as they are for the low-rank networks. These ranks and sparsities were chosen such that for each rank we examined, we also looked at a sparsity level for which the number of recurrent parameters in each parameterization is roughly equivalent. For example, since the networks we constructed had a hidden dimension of size 64, a recurrent matrix with a sparsity level of 0.5 has the same number of parameters as one with a rank of 16. We did not present results of networks with a very high recurrent sparsity like 0.95 (which would roughly be the sparse analog to rank-1 networks) due to optimization difficulties encountered, particularly in LSTMs and GRUs. In order to ensure that the performance of a given network wasn't due to a favorable random sparse mask, we trained each model 3 times from different random seeds and averaged over the model performance.

Finally, we also employed an initialization scheme for the recurrent weights distinct from the default initialization schemes given in open-source implementations. For details on this, refer to A.10.

#### A.11.4 EVALUATION METRICS

Trained models were evaluated offline on a validation/test set with respect to their cross-entropy loss in the case of ALE networks and mean-squared error in the case of MuJoCo networks. However, in practice, we care about how the agent performs when deployed in the environment closed-loop. The online rewards were computed by performing 10 simulations of the agent in the environments and averaging over the rewards from each episode. The in-distribution setting refers to the environments in which the observations are not modified aside from preprocessing performed by RLlib.

In the distribution shift setting, for the ALE observations we perform 5 types of perturbations to the agent's observations: cutout, brighten, darken, noise, and blur. In cutout, we remove some pixels from the center of the input image. In brighten, we shift all the pixel values by a constant amount in the positive direction and do the same for darken but shift the pixels in the negative direction. To noise the image, we draw random noise from a uniform distribution and add it to the input image. For distribution shifts in the MuJoCo environments, we perform 3 types of perturbations: noise, dropout and offset. To noise the observations, we draw random noise from a normal distribution and add it to the observation vector. To blur the observations, we perform a Gaussian blurring on the image. To perform dropout, we mask a subset of the dimensions in the observation vector. To perform offset, we, with equal probability, shift the observation vector in the positive or negative direction by an amount constant across all dimensions. For each of the inputs during closed-loop navigation, we apply the distribution shift with probability  $p = 0.1$ .

To evaluate the models, both in-distribution and under distribution shift, we normalize the rewards by the performance of the expert policy in order to convert the rewards into units that allow us to benchmark the performance of the imitation learning agents while also making comparisons across recurrent models and connectivities.

#### A.11.5 DETAILS ON NETWORK ANALYSES

In this section, we further elaborate on the chosen modes of analysis in the trained recurrent networks and in cases where the metric computation is potentially ambiguous we elaborate on the methodology used to compute it. All the plots shown in the paper regarding these analyses were performed on models trained in the Seaquest environment.

**Spectral analyses.** For recurrent networks that have more than one set of recurrent weights (CfCs, LSTMs, GRUs), any of the spectral statistics that were computed (i.e. eigenspectrum, recurrent weights singular value spectrum, input weights singular value spectrum, etc.) we compute and plot a single statistic that represents the average over the statistics of each of the individual recurrent weight matrices.

On a separate note, with respect to measuring the decay of the singular value spectrum, note that we normalized the sorted set of singular values by the spectral norm. This was done in order to explain away the magnitude of the transformation, since we separately motivate and analyze the spectral norm. Doing so also ensures each of the decay curves start at 1 which enables comparison across models, ranks and sparsities.

**Recurrent gradient analysis.** In Section 4.2, we briefly discussed the analysis performed to analyze the evolution of the recurrent gradients across time. Here, we provide some additional details that were not addressed in the main portion of the paper.

Firstly, we computed the norm of the gradients in log space due to the exponential decay associated with the gradients over time (which happens in practice because gradient propagation is multiplicative). Secondly, note that each of the recurrent gradients start evolving from 0. We enforced the decay to start from 0 since we do not care about the starting value of the gradients at the end of time, but rather how this gradient evolves in units relative to the start value across time (i.e. the rate of decay matters, but not the value it started decaying at). So, we translated the curves to begin at 0, irrespective of their starting value.

**Effective dimensionality of trajectories.** To understand the complexity of the dynamics across recurrent models, connectivity ranks and connectivity sparsities, we collected the trajectories of the model during the simulation of the agent in the online, closed-loop setting and fit a PCA on the entire set of trajectories. We then computed the explained variance of the top 5 principal components (PCs) as a proxy for the effective dimensionality of the trajectories. This is a canonical approach to analyzing state-space trajectories in recurrent networks (Lechner et al., 2020).

However, we extended the canonical analysis beyond just the full state-space trajectories by decomposing the trajectories into recurrently-driven activity and input-driven activity. In particular, we considered  $\mathbf{W}_{rec}\mathbf{h}(t-1)$  as the recurrent activity and  $\mathbf{W}_{inp}\mathbf{x}(t)$  as the input activity. We analogously aggregated these trajectories individually and computed the explained variance of the top 5 PCs. This gives us separate measurements for what the dimensionality of activity looks like in the recurrent subspace versus the input subspace and allows us to explicitly disentangle these two axes.

For recurrent networks that have more than one set of recurrent (and input) weights (CfCs, LSTMs, GRUs), we computed the explained variance of the top 5 PCs individually for each set of weights and then averaged across them to produce a single number summary for the complexity of network dynamics.

#### A.12 MODEL PARAMETER COUNTS

| model | parameter count |
|-------|-----------------|
| CfC   | 61632           |
| LSTM  | 81726           |
| RNN   | 20544           |
| GRU   | 61632           |

Table 10: Parameter counts of the fully-connected, full-rank versions of each recurrent model. Input size = 256, hidden state size = 64.
